# Supplementary material for: A new domestic cat genome assembly based on long sequence reads empowers feline genomic medicine and identifies a novel gene for dwarfism
Source: PubMed Central journal article supplement (PMC7581003; doi:10.1371/journal.pgen.1008926), 2020-10-22

felCat9 recombination

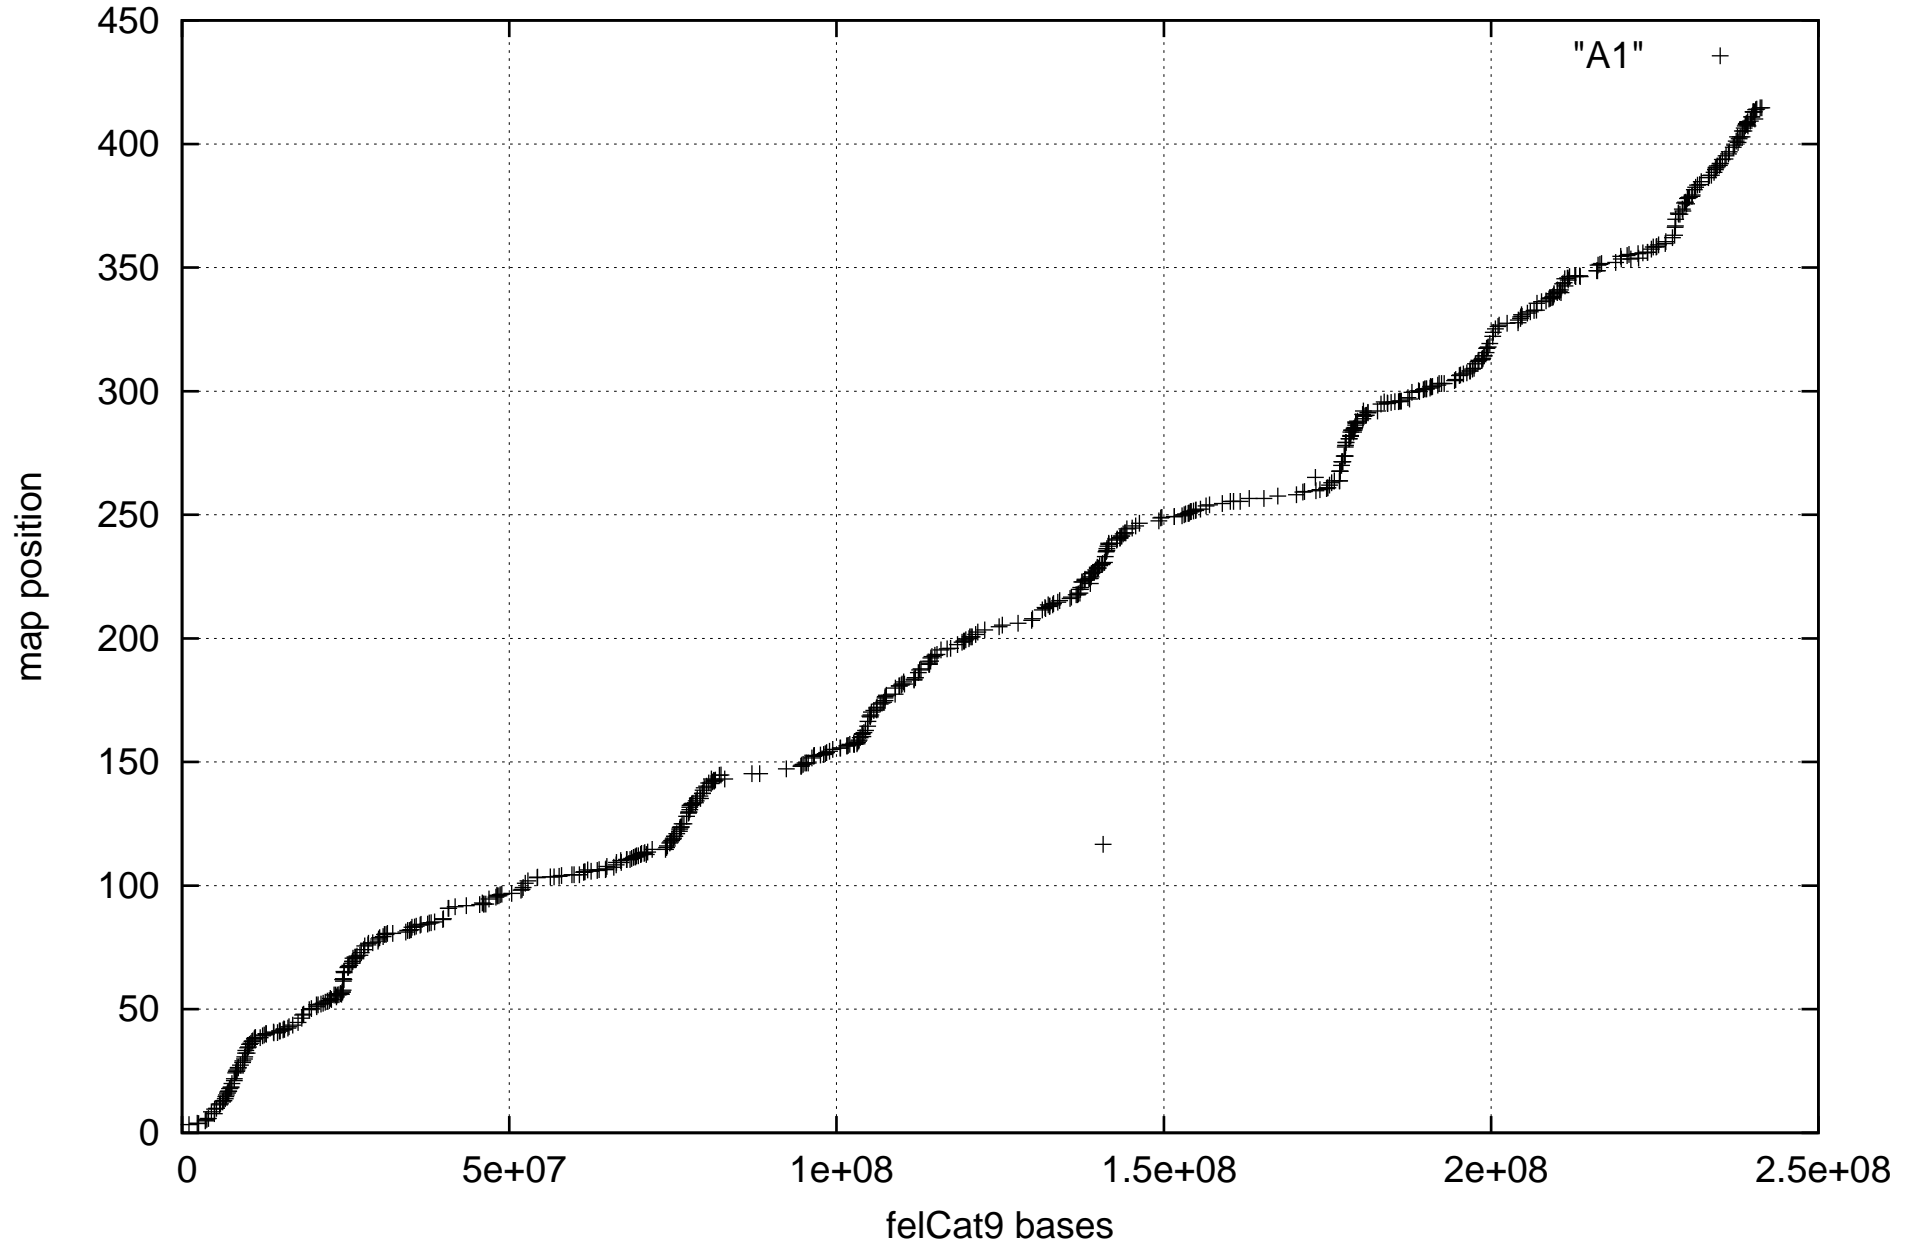

felCat9 recombination

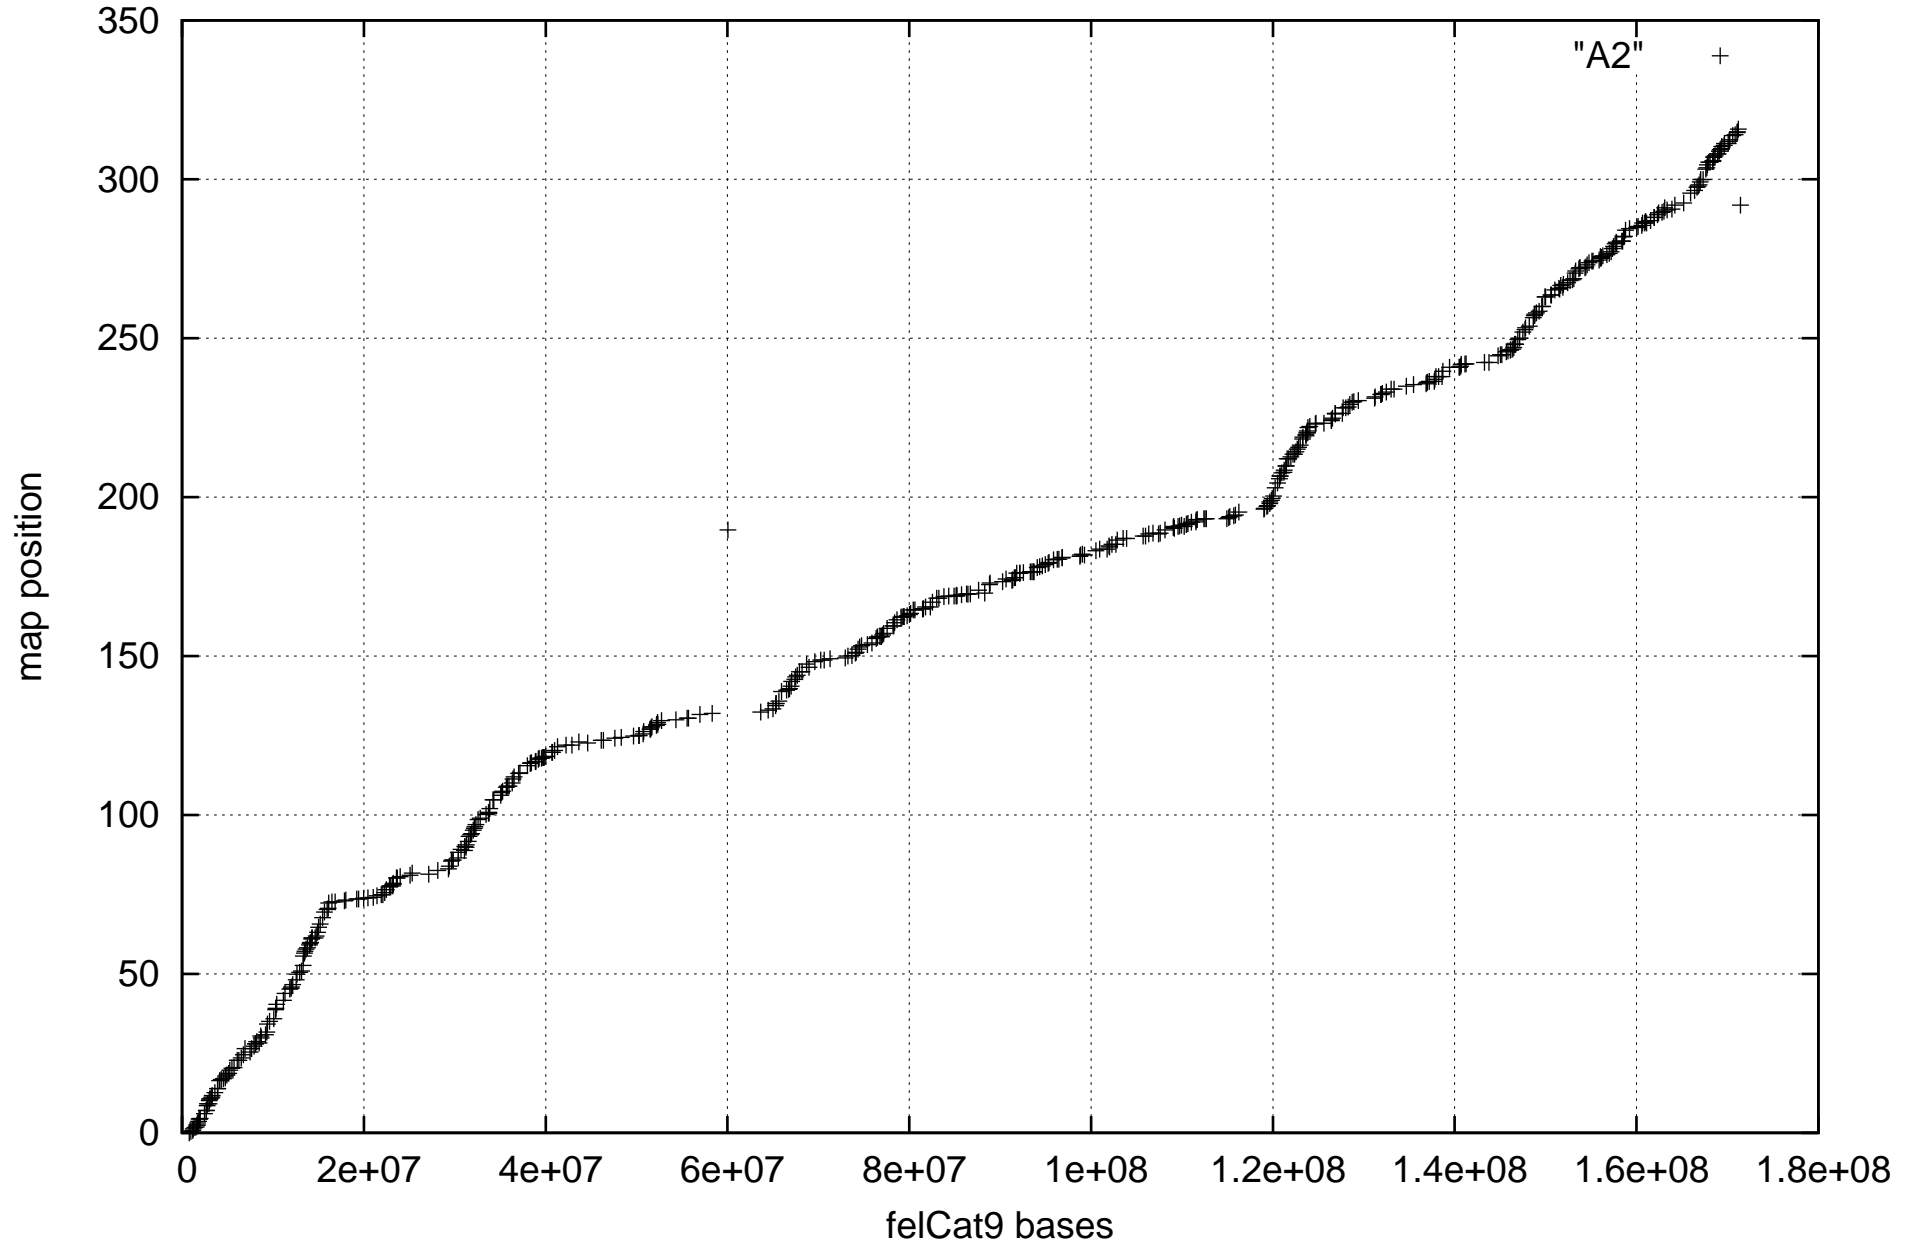

felCat9 recombination

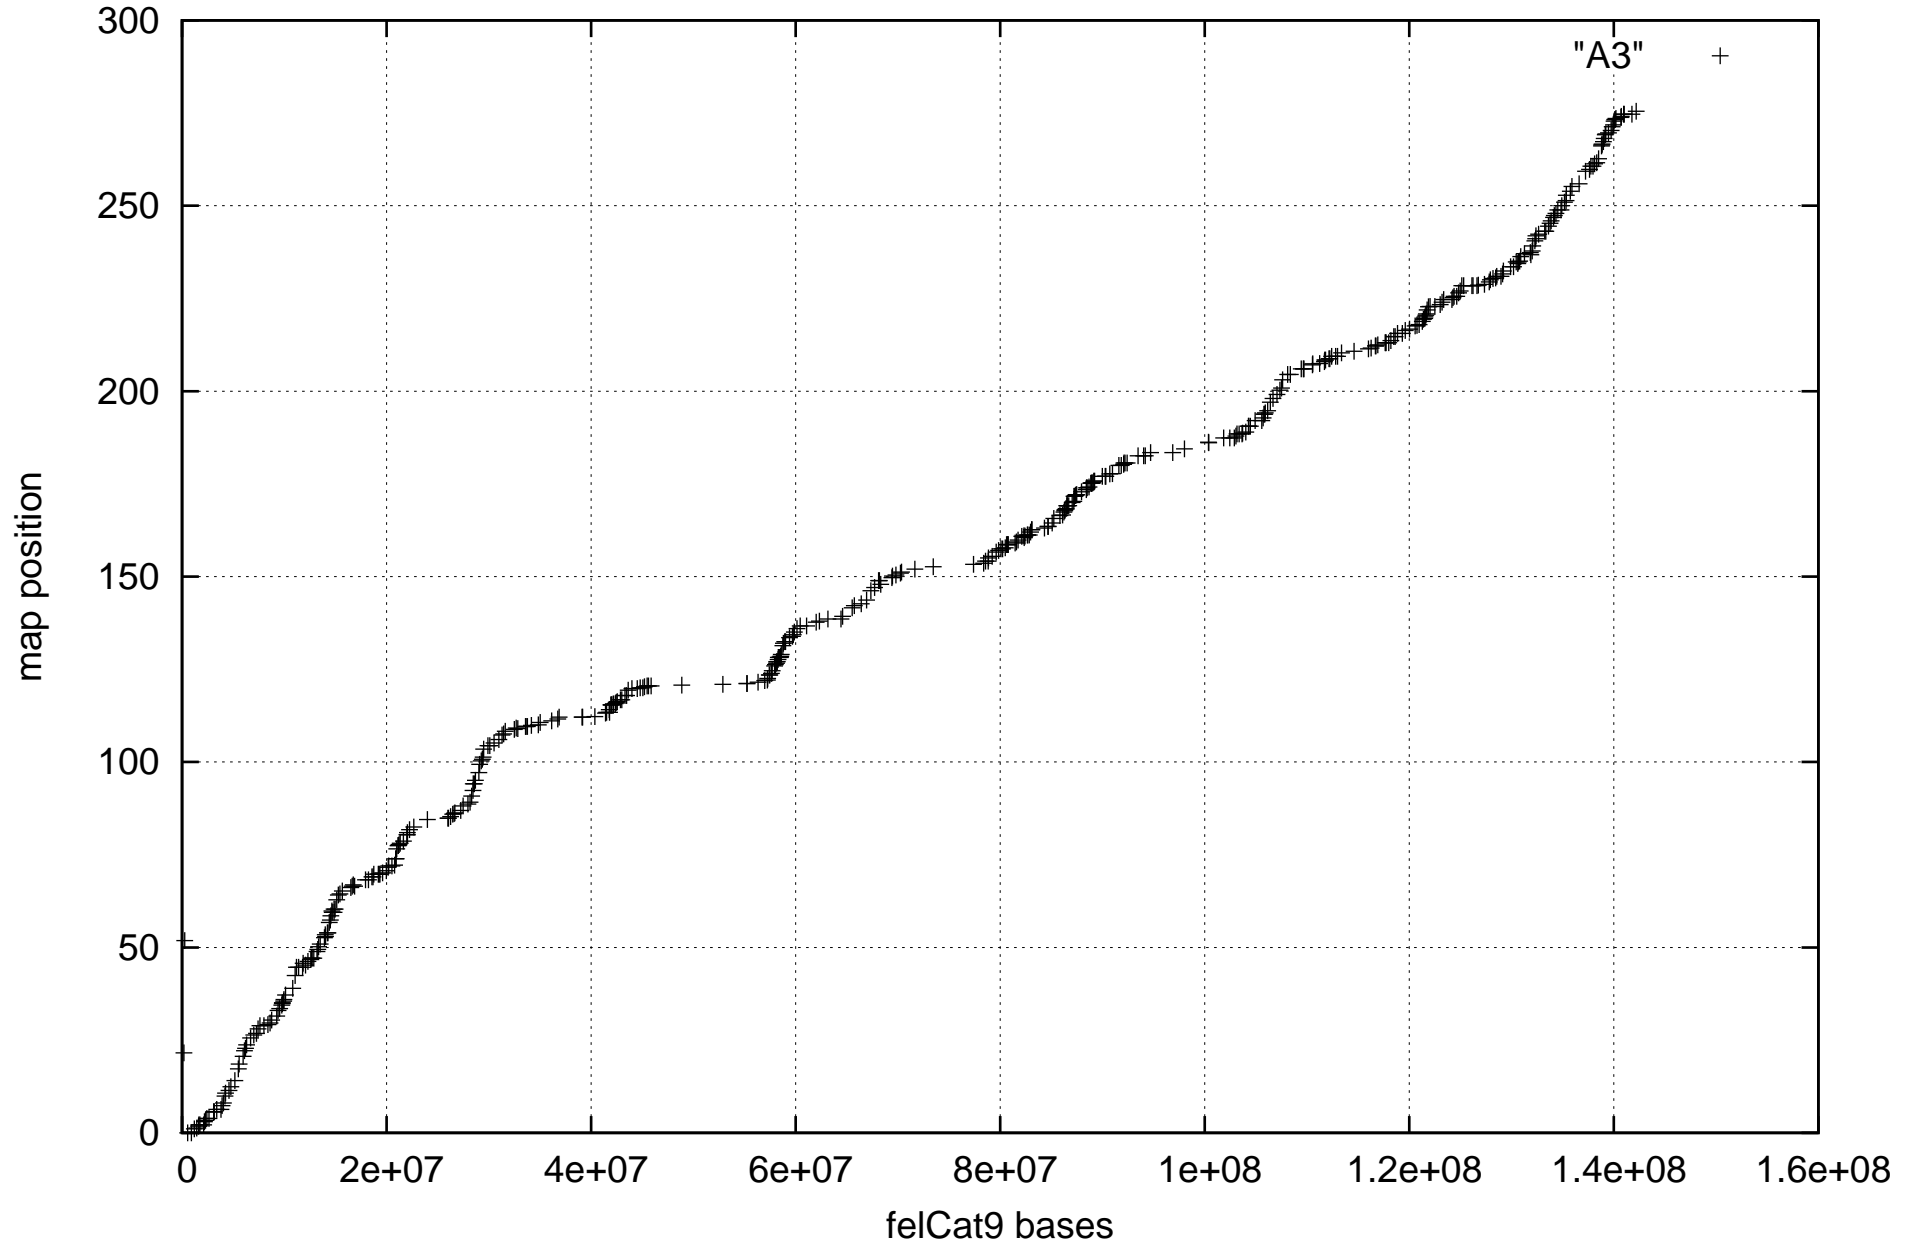

felCat9 recombination

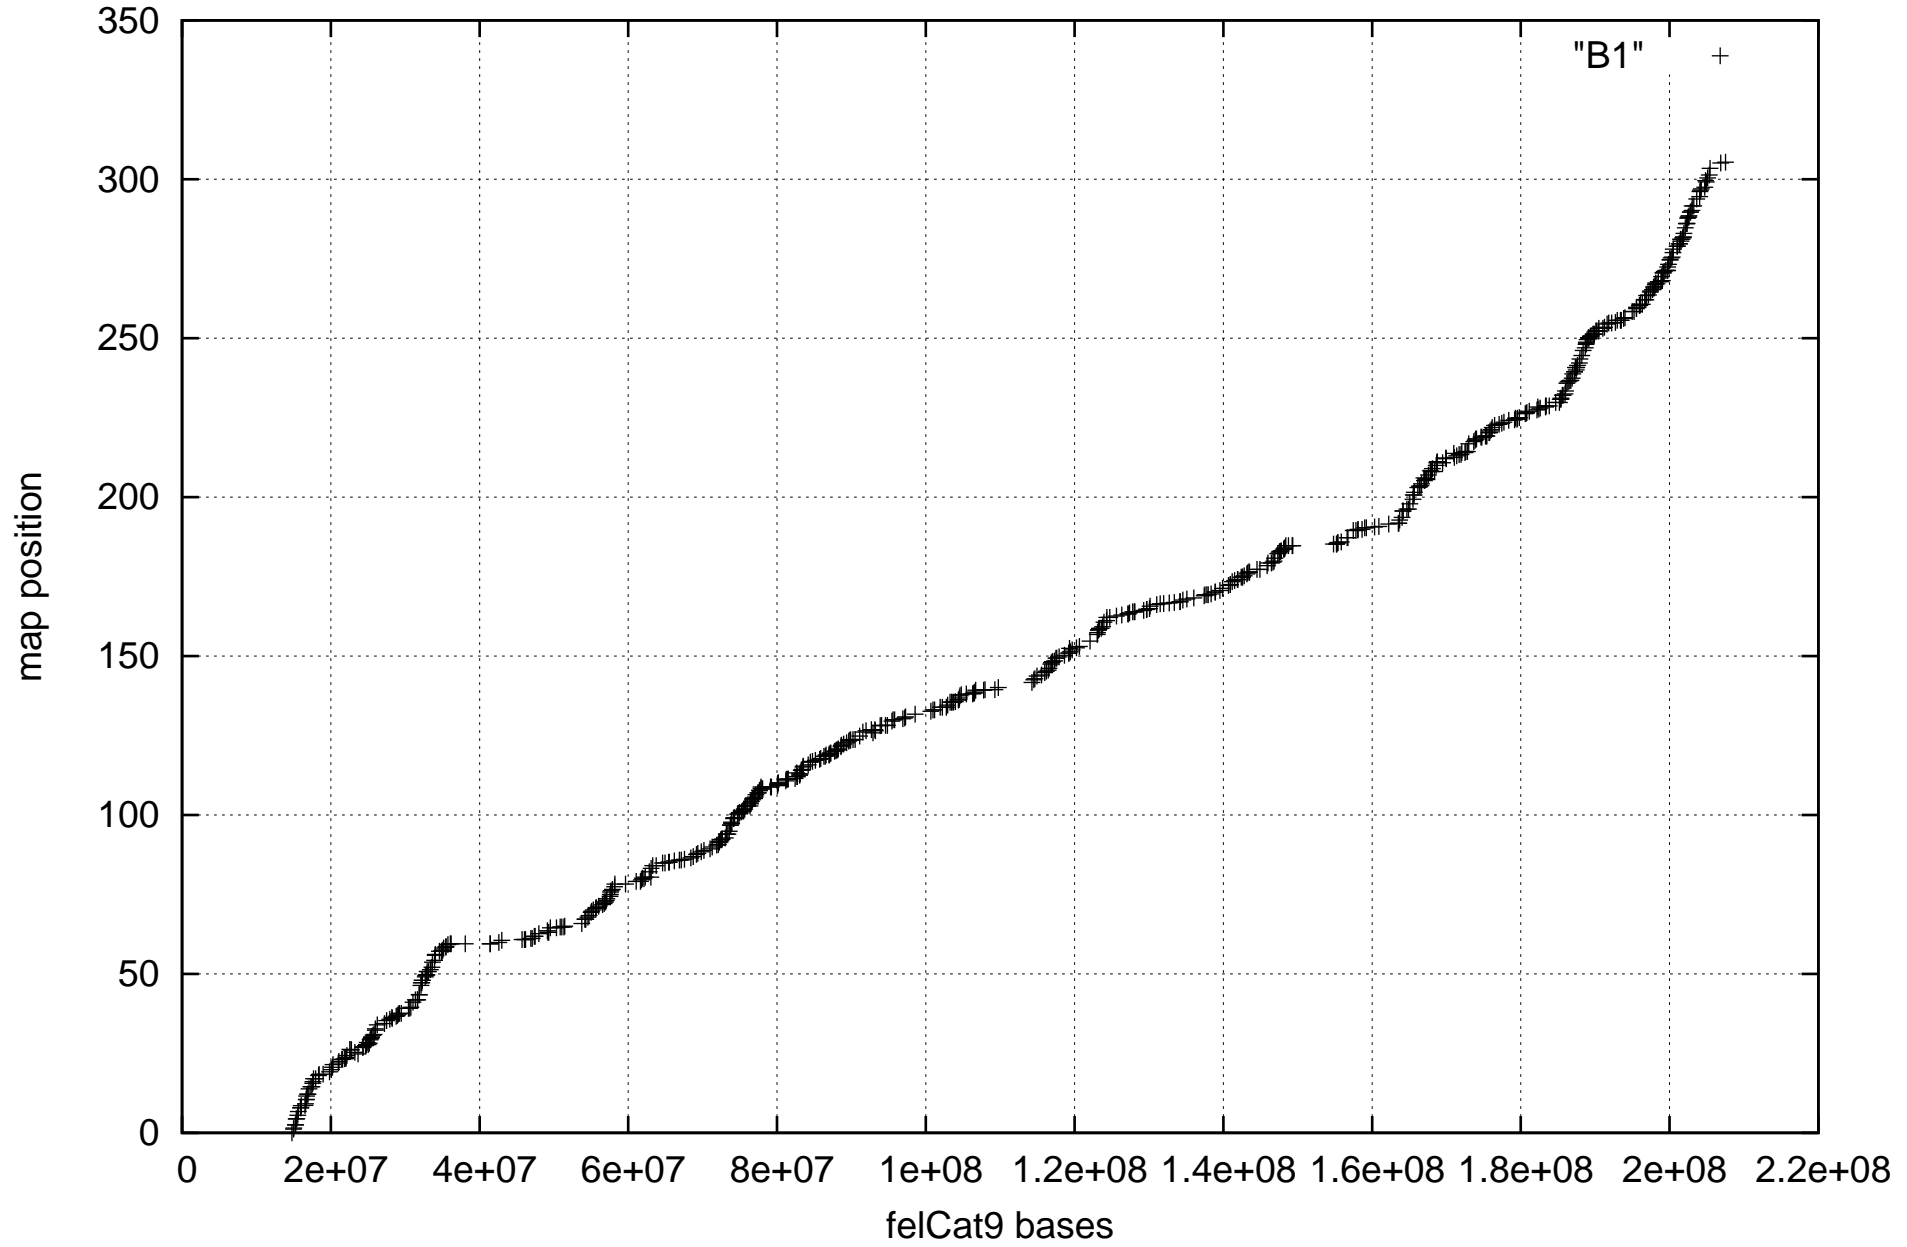

felCat9 recombination

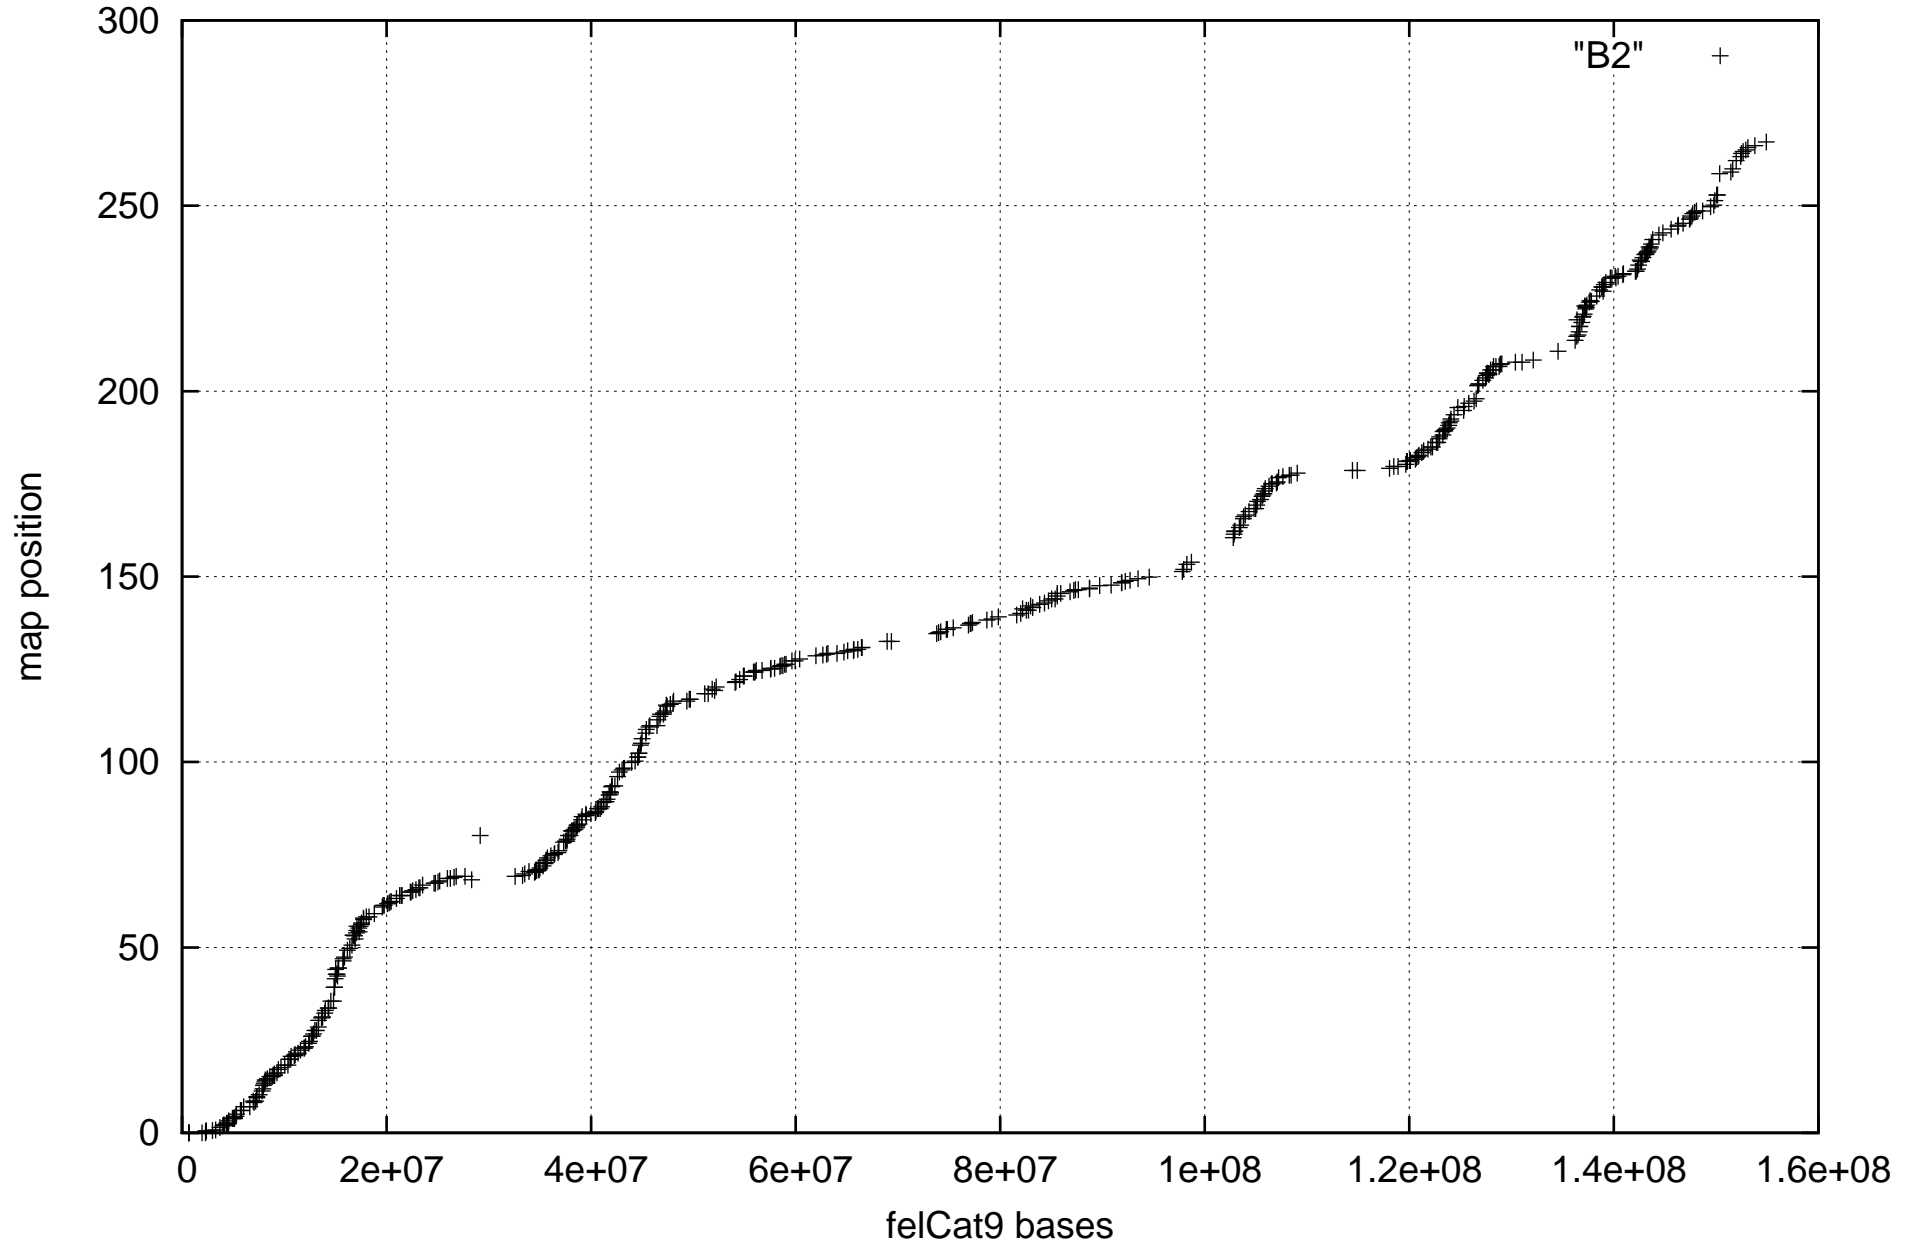

felCat9 recombination

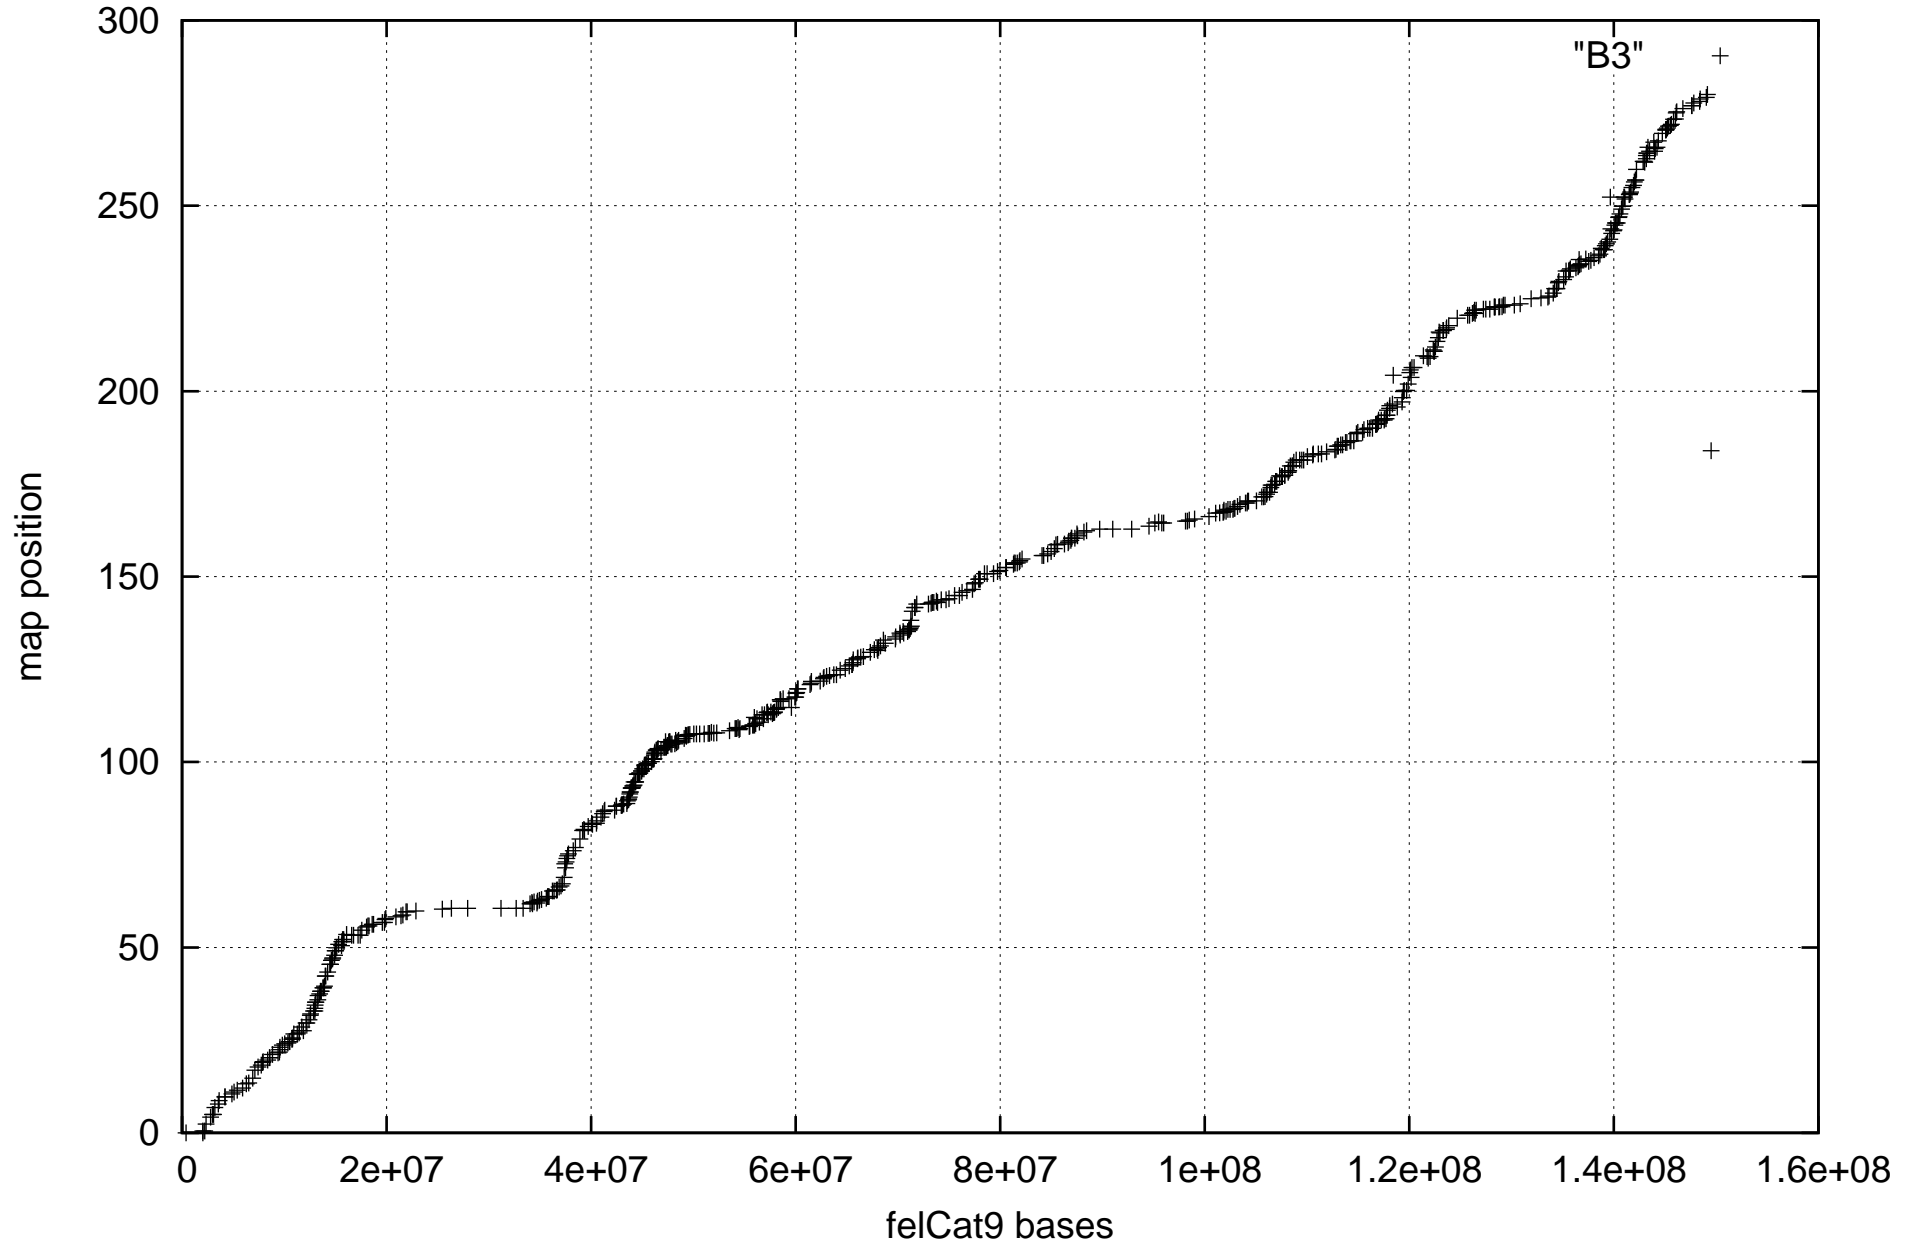

felCat9 recombination

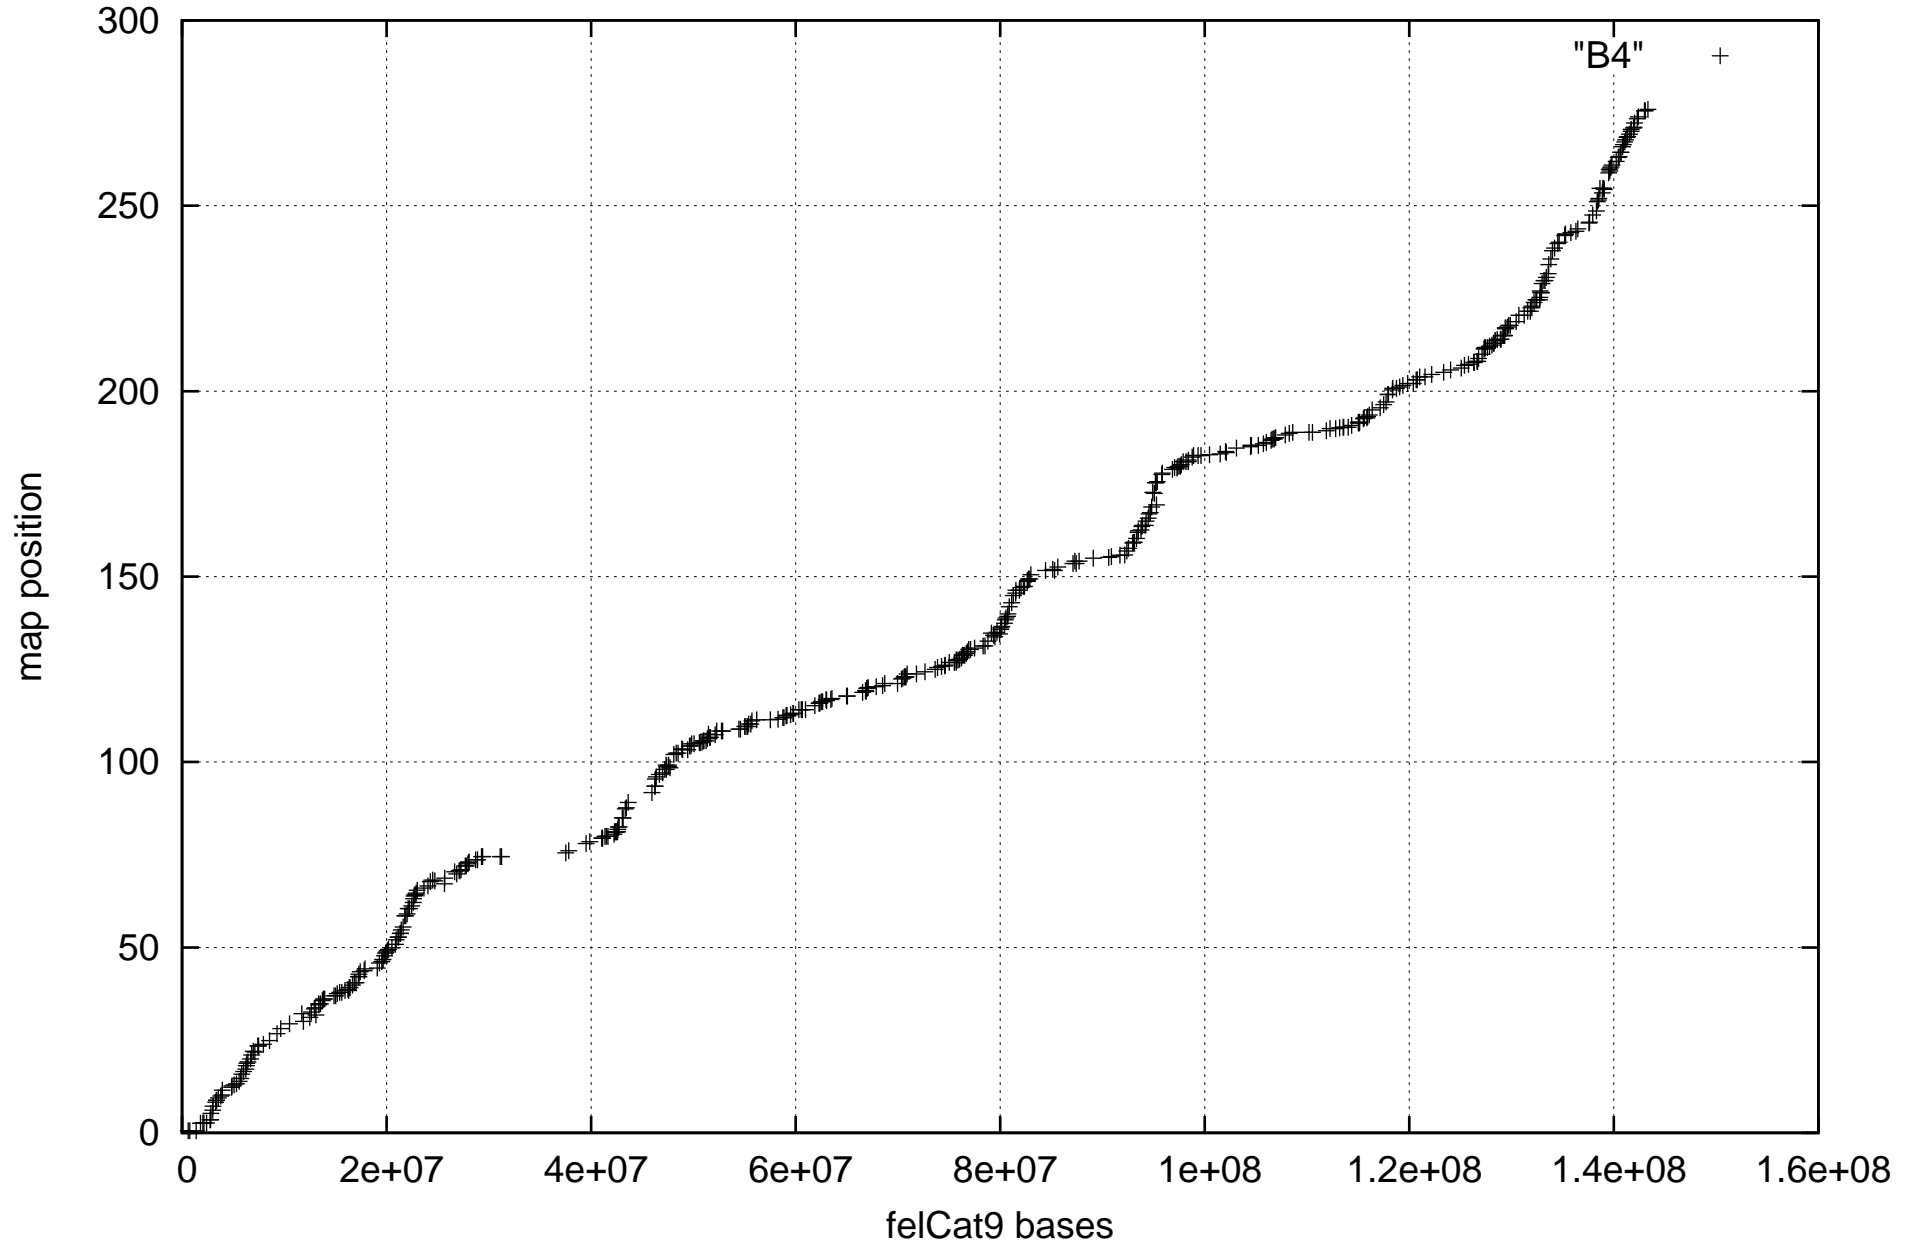

felCat9 recombination

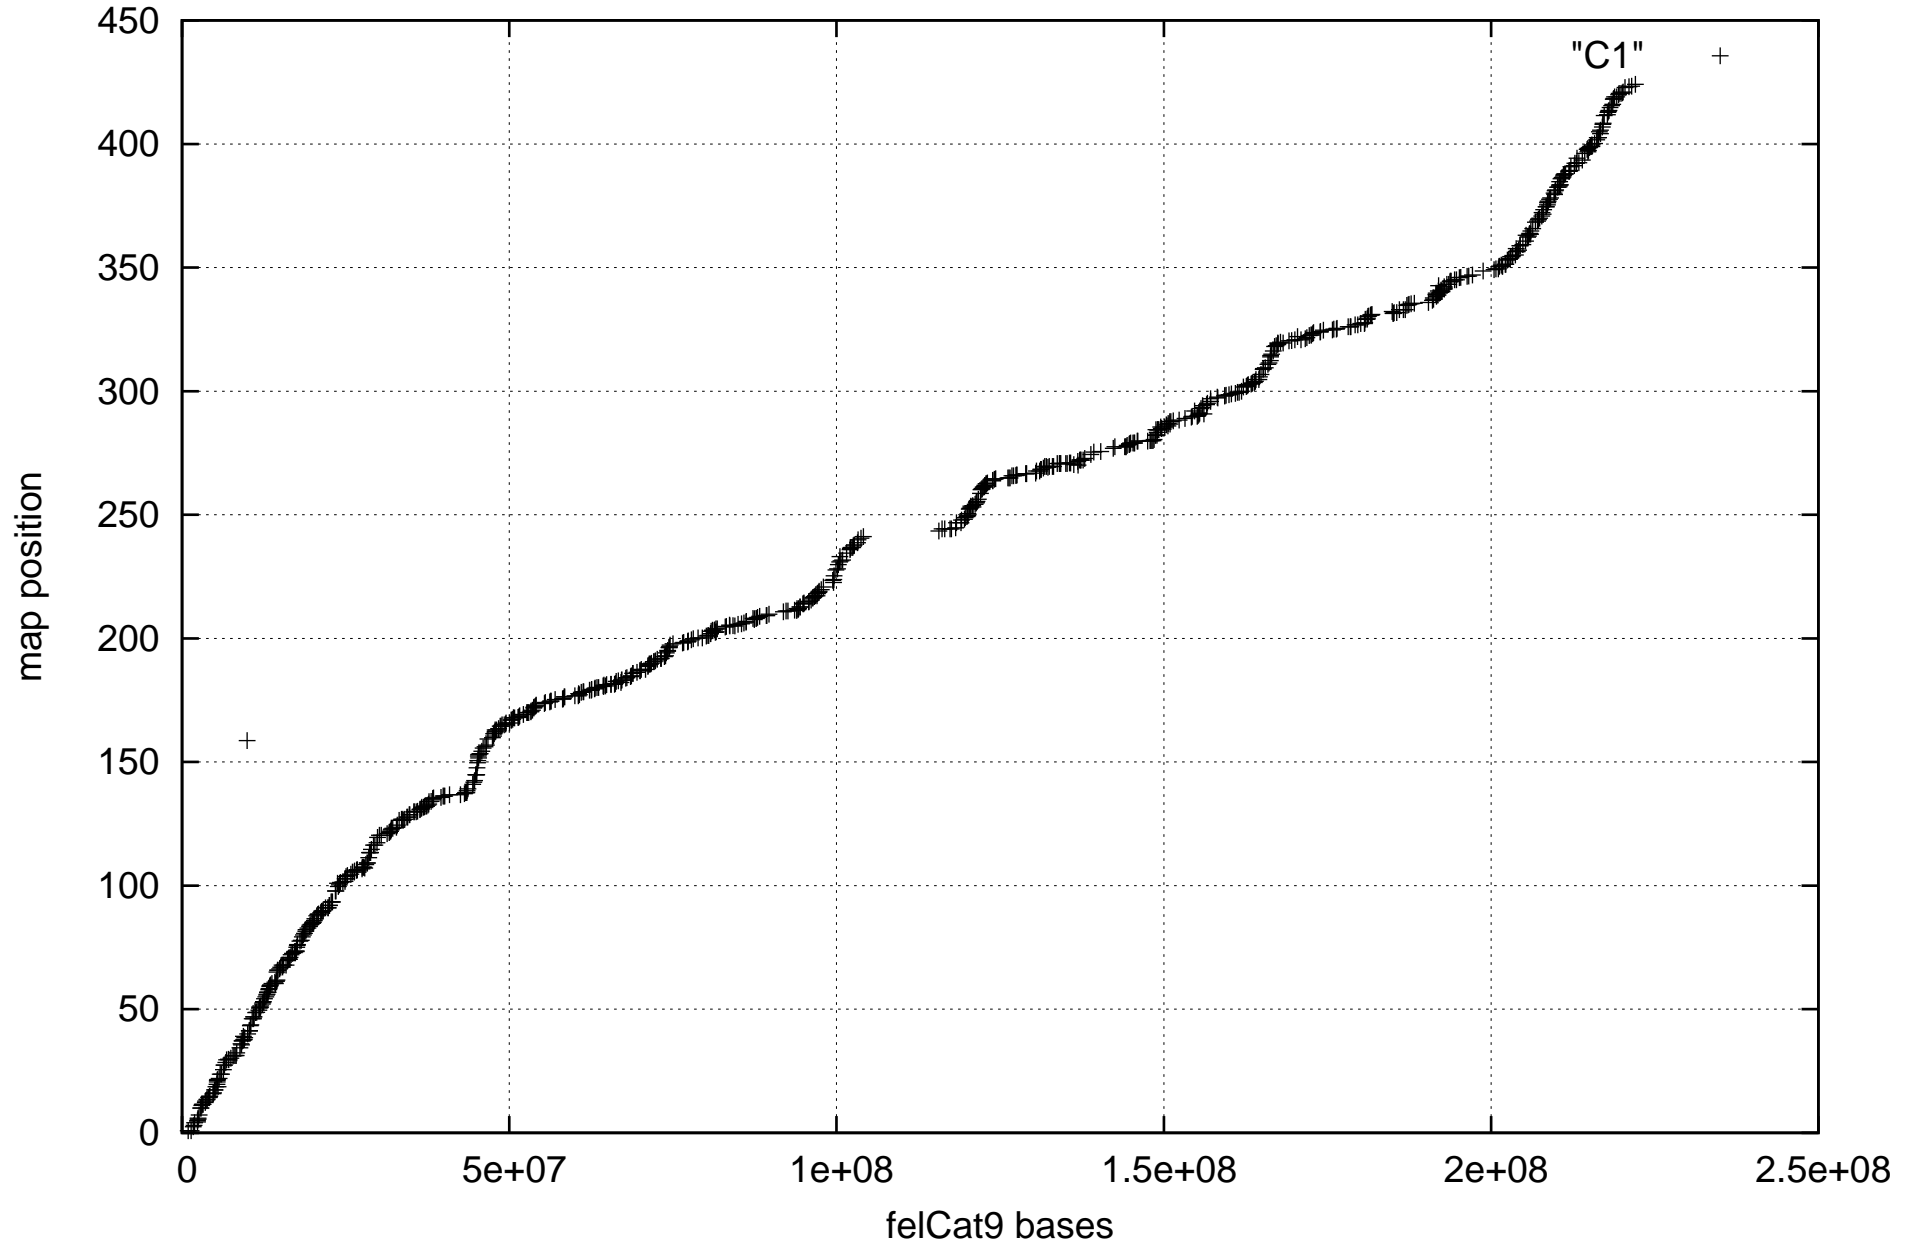



felCat9 recombination

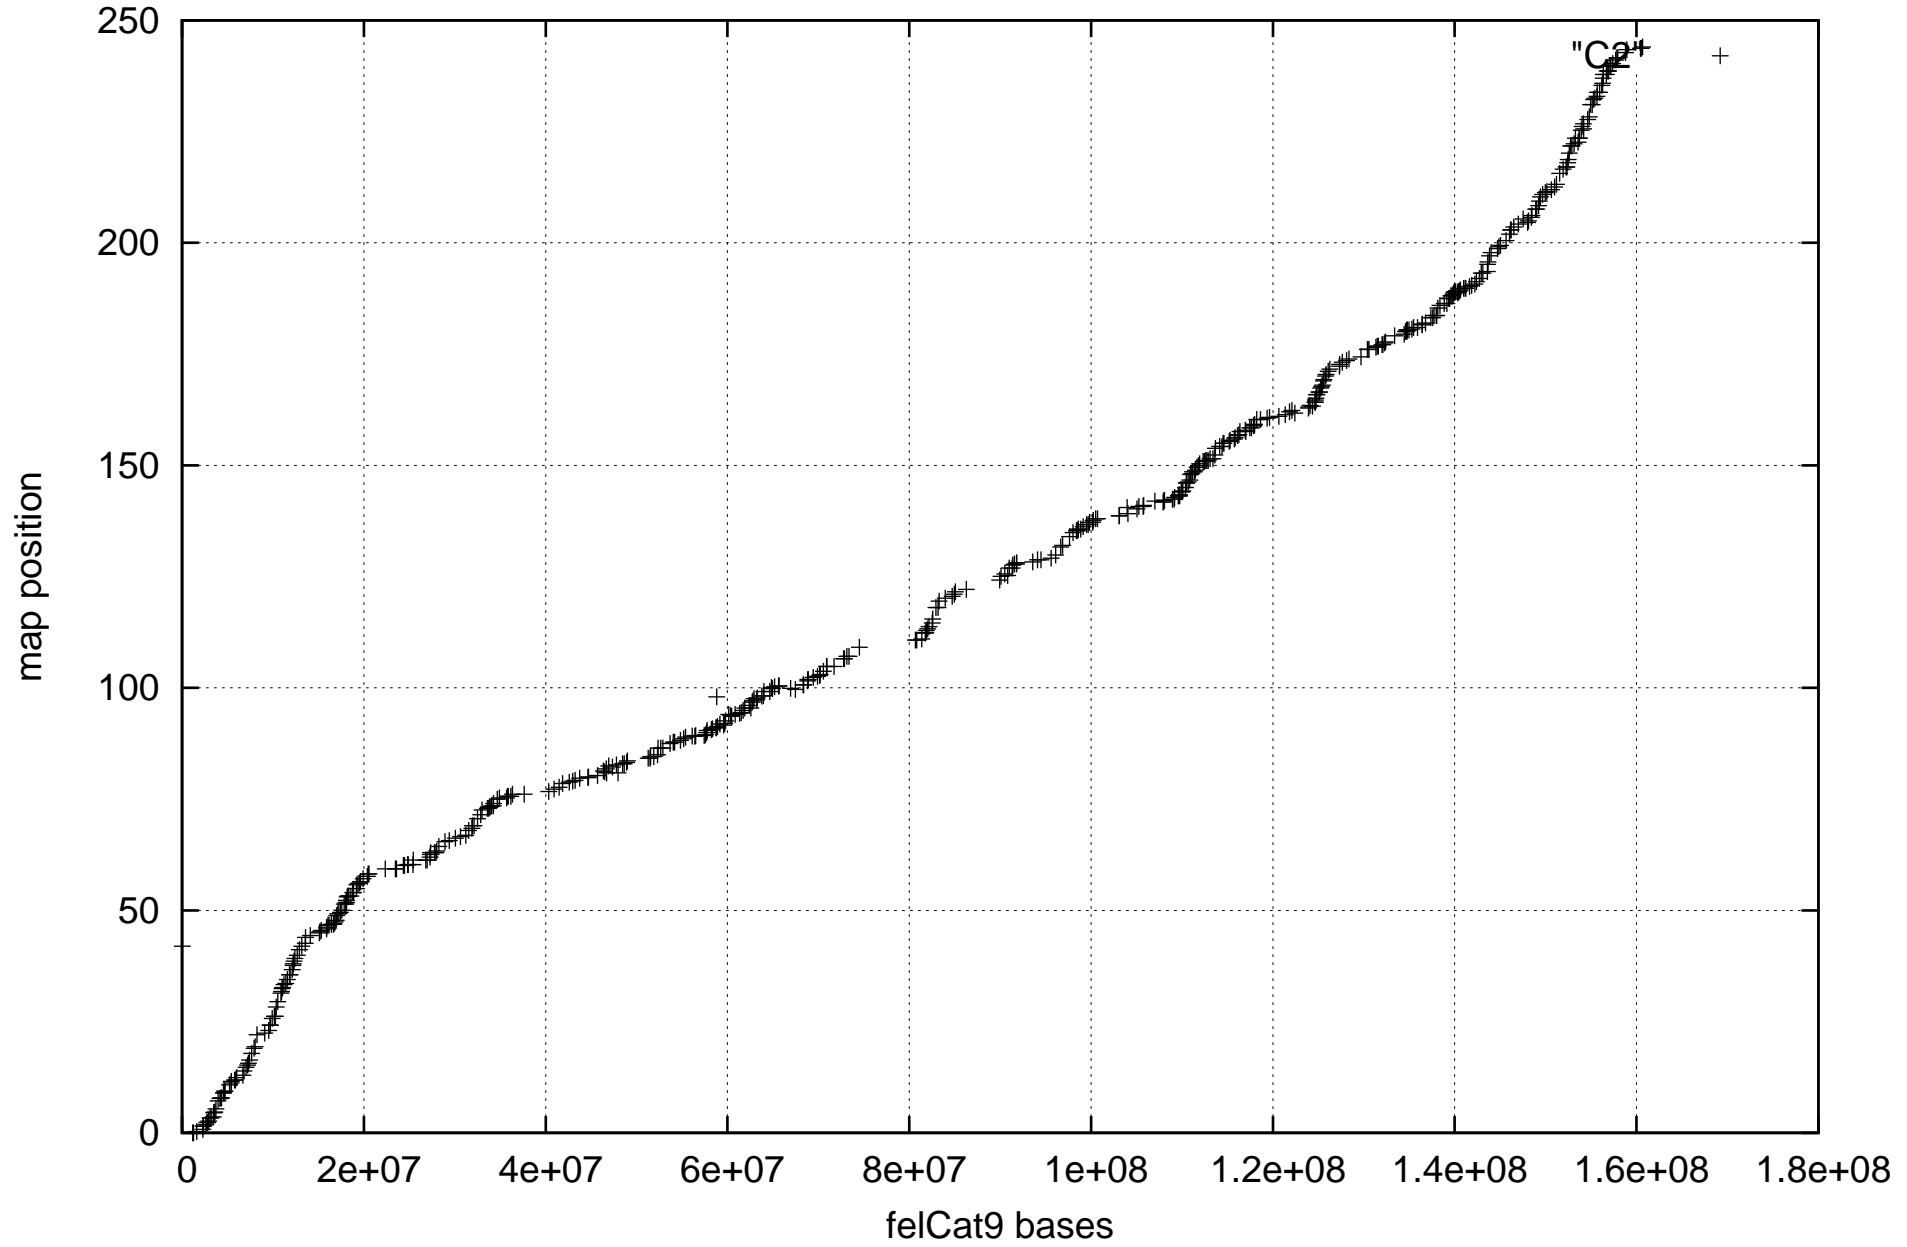

felCat9 recombination

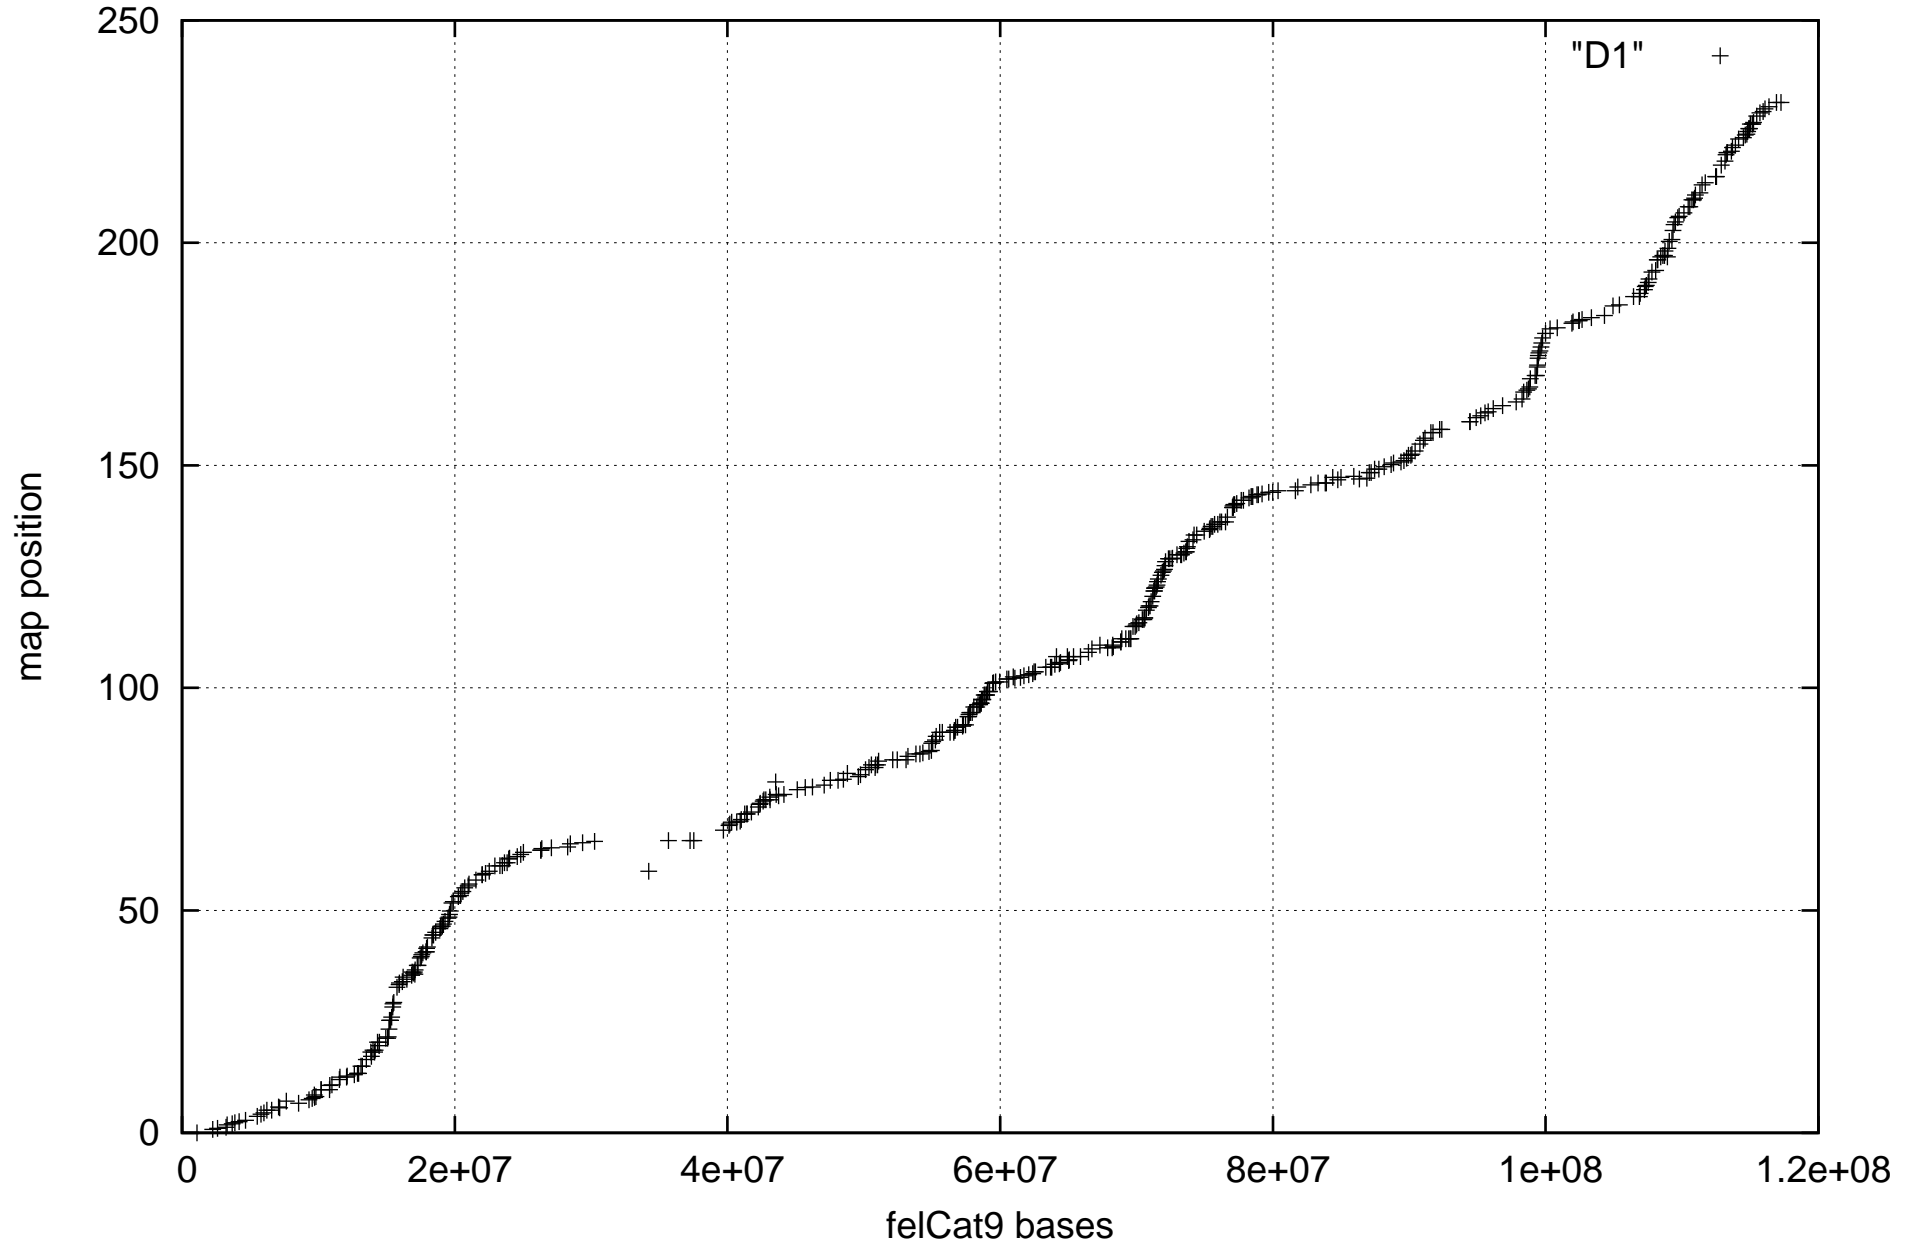

felCat9 recombination

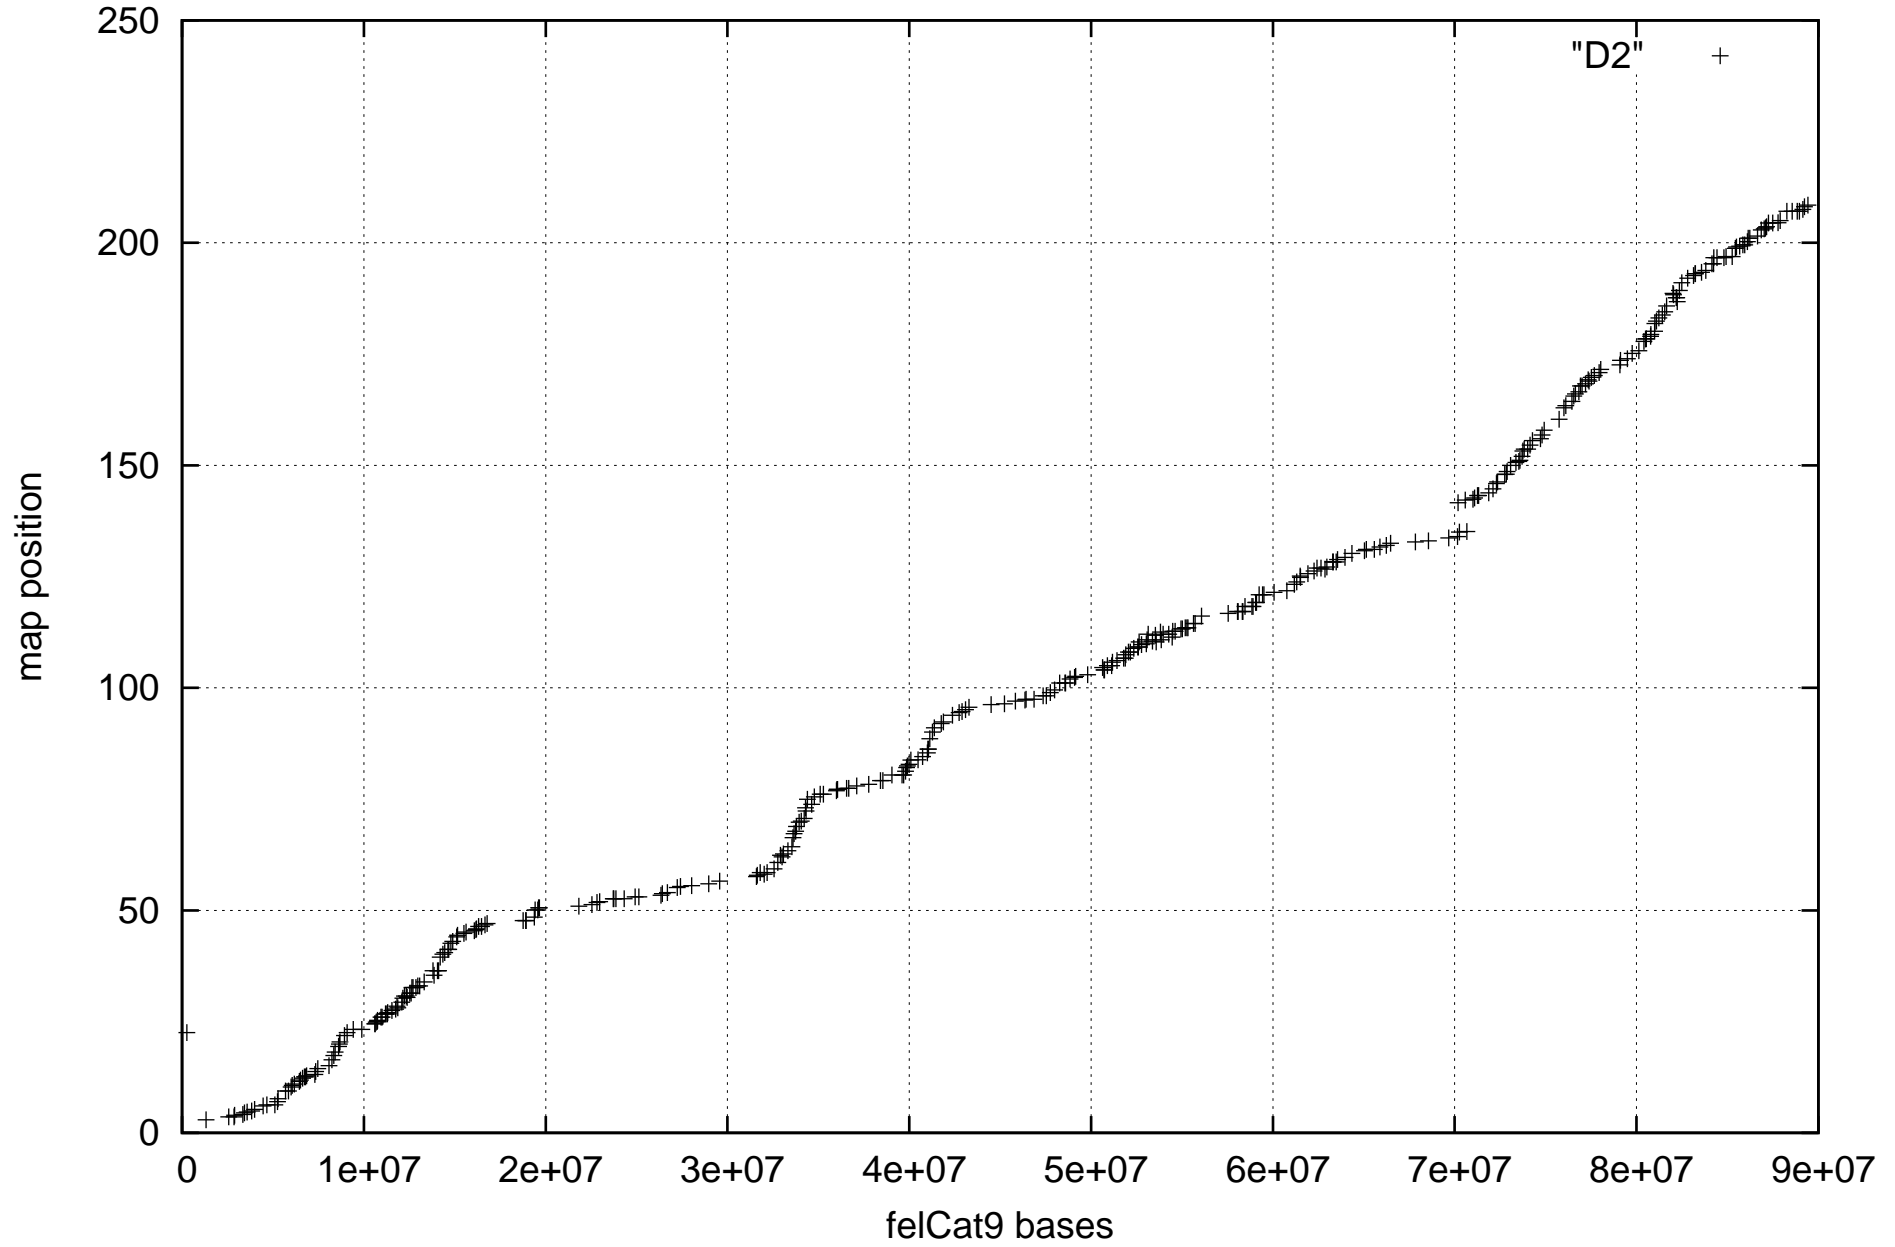

felCat9 recombination

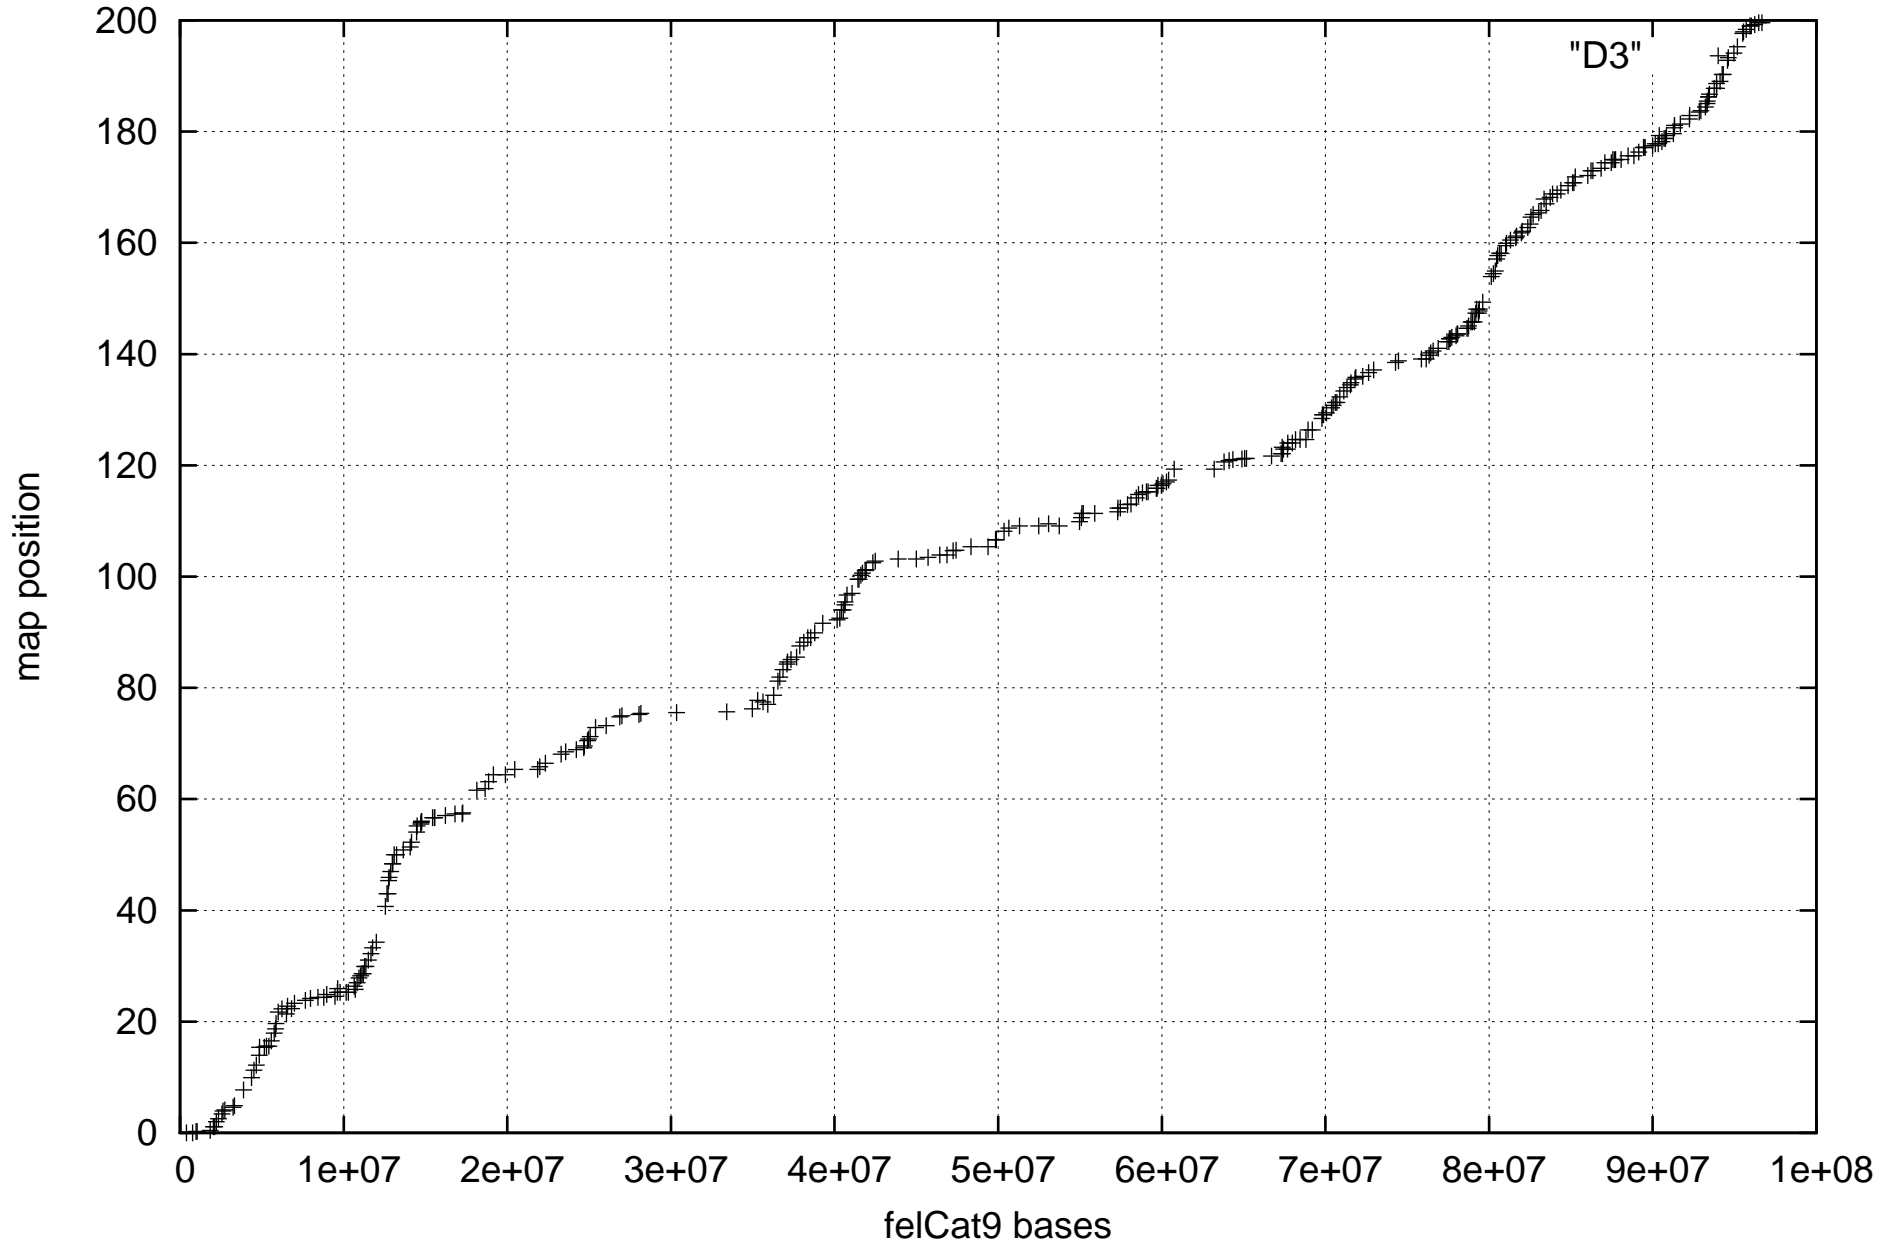

felCat9 recombination

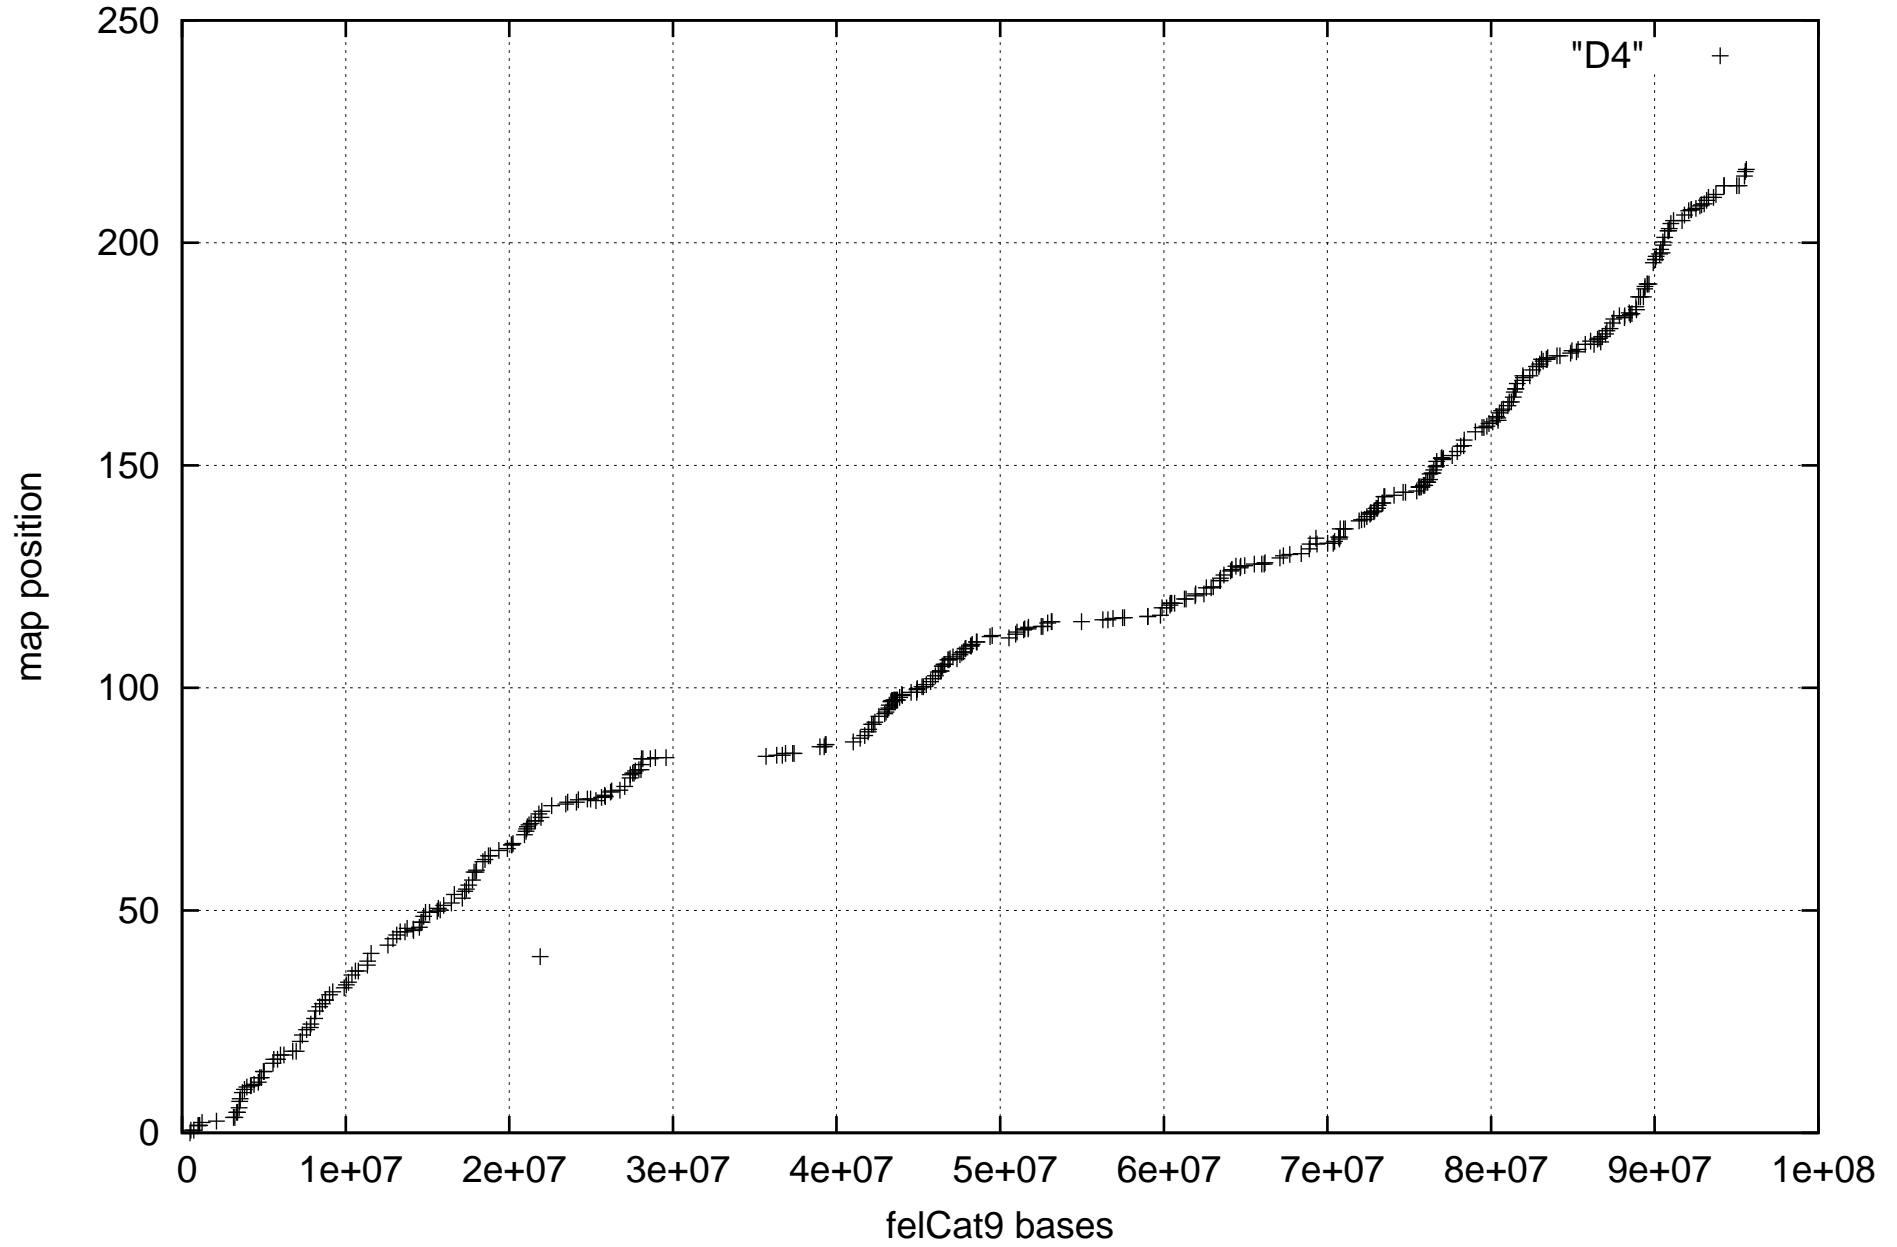

felCat9 recombination

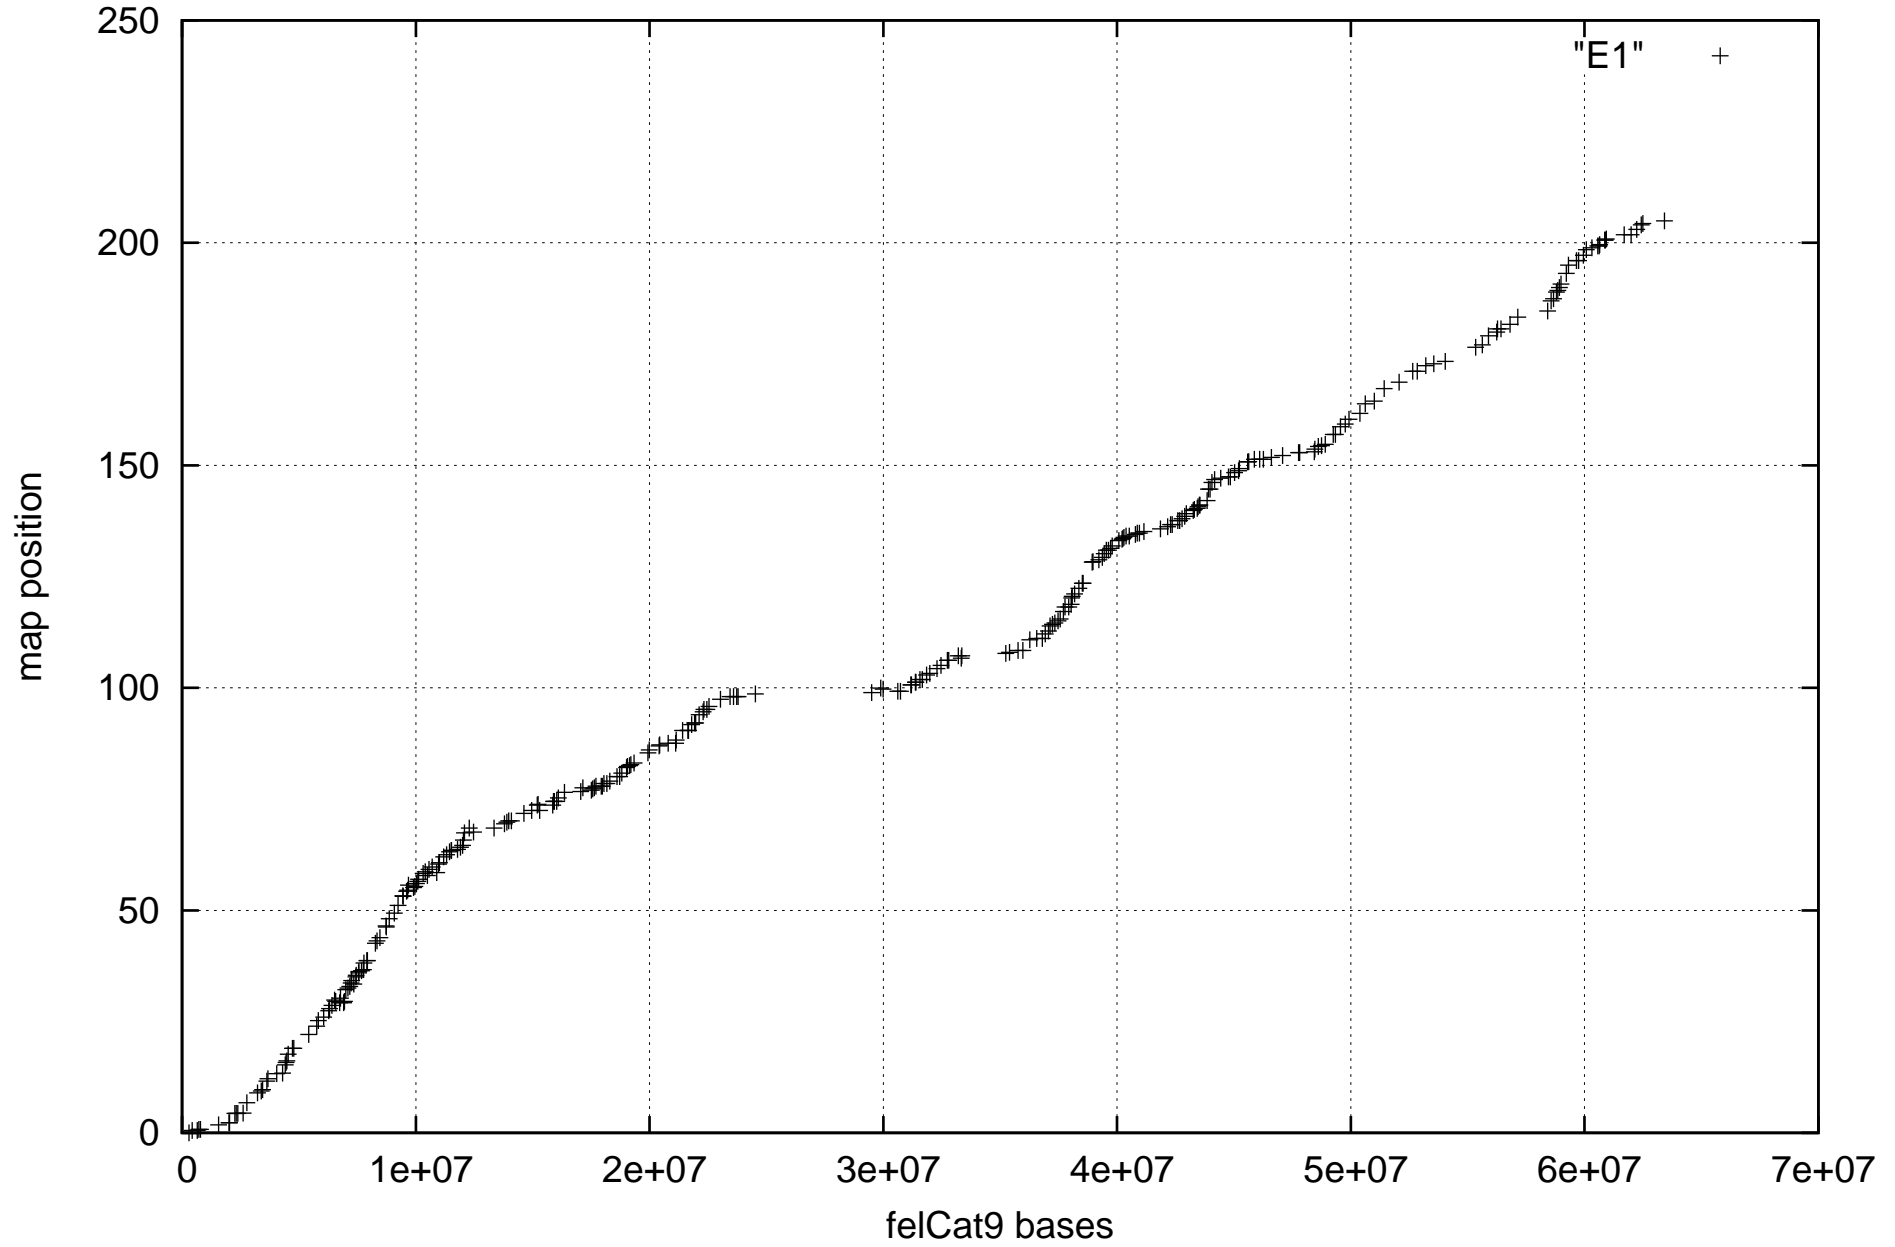

felCat9 recombination

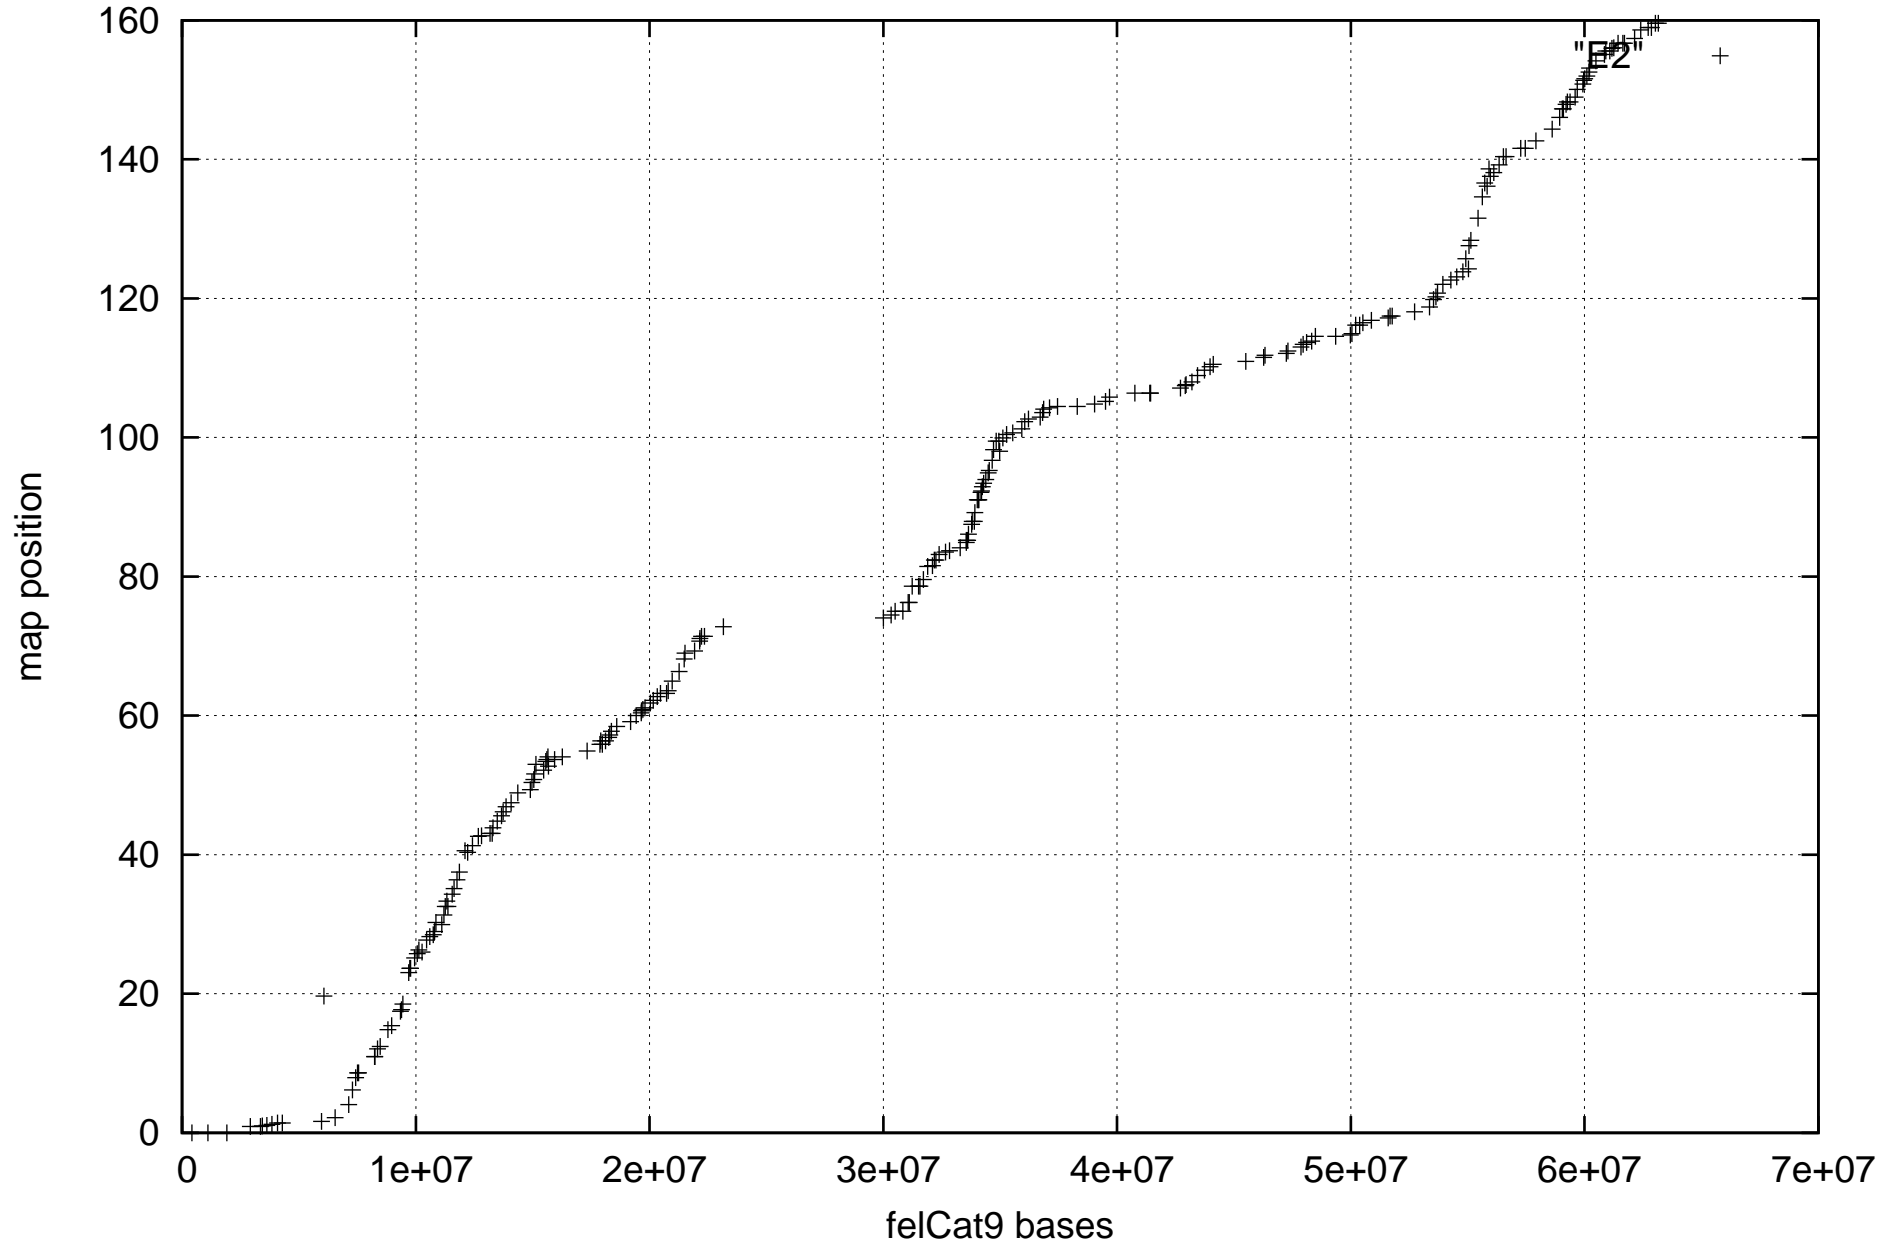

# felCat9 recombination

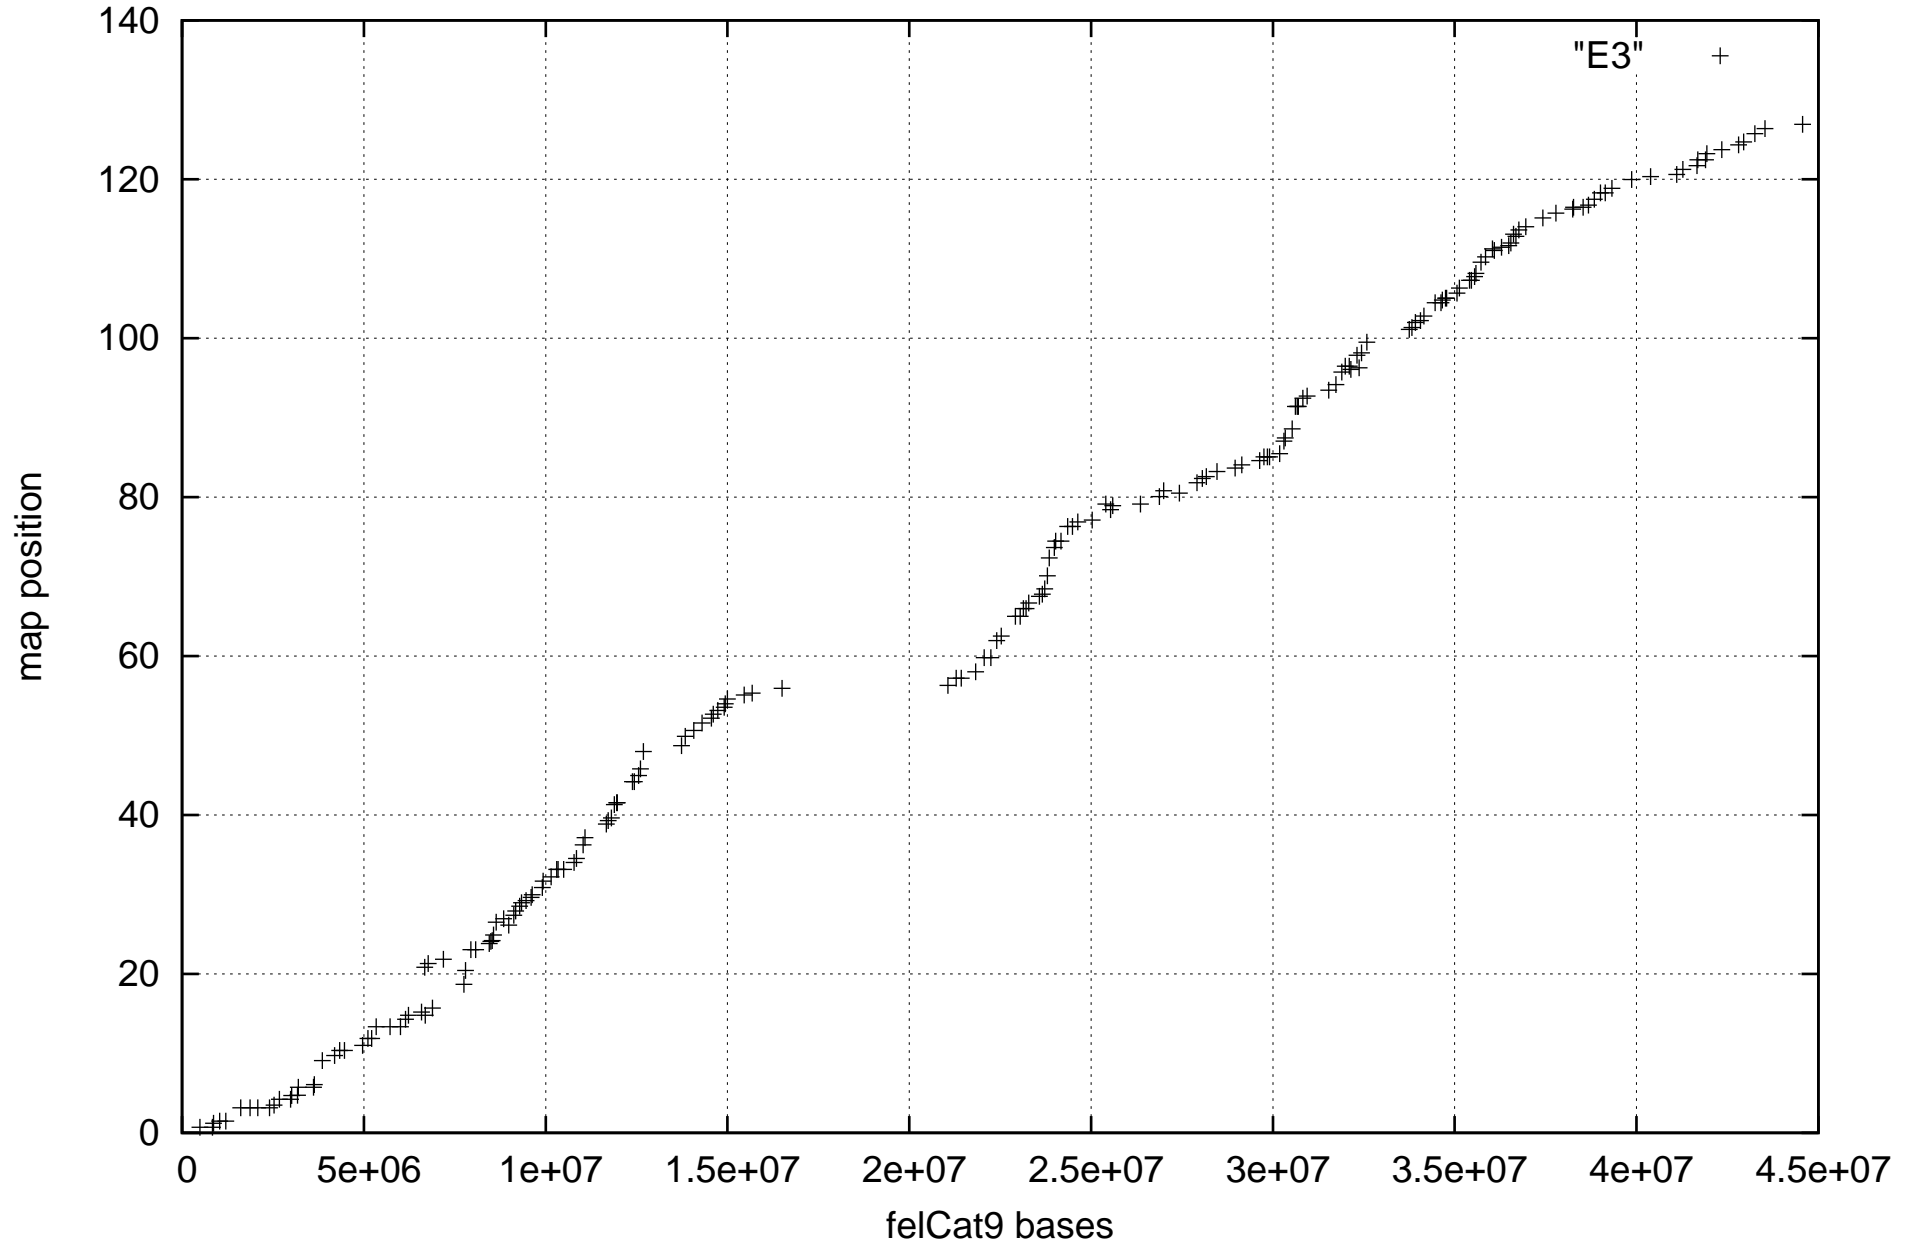



felCat9 recombination

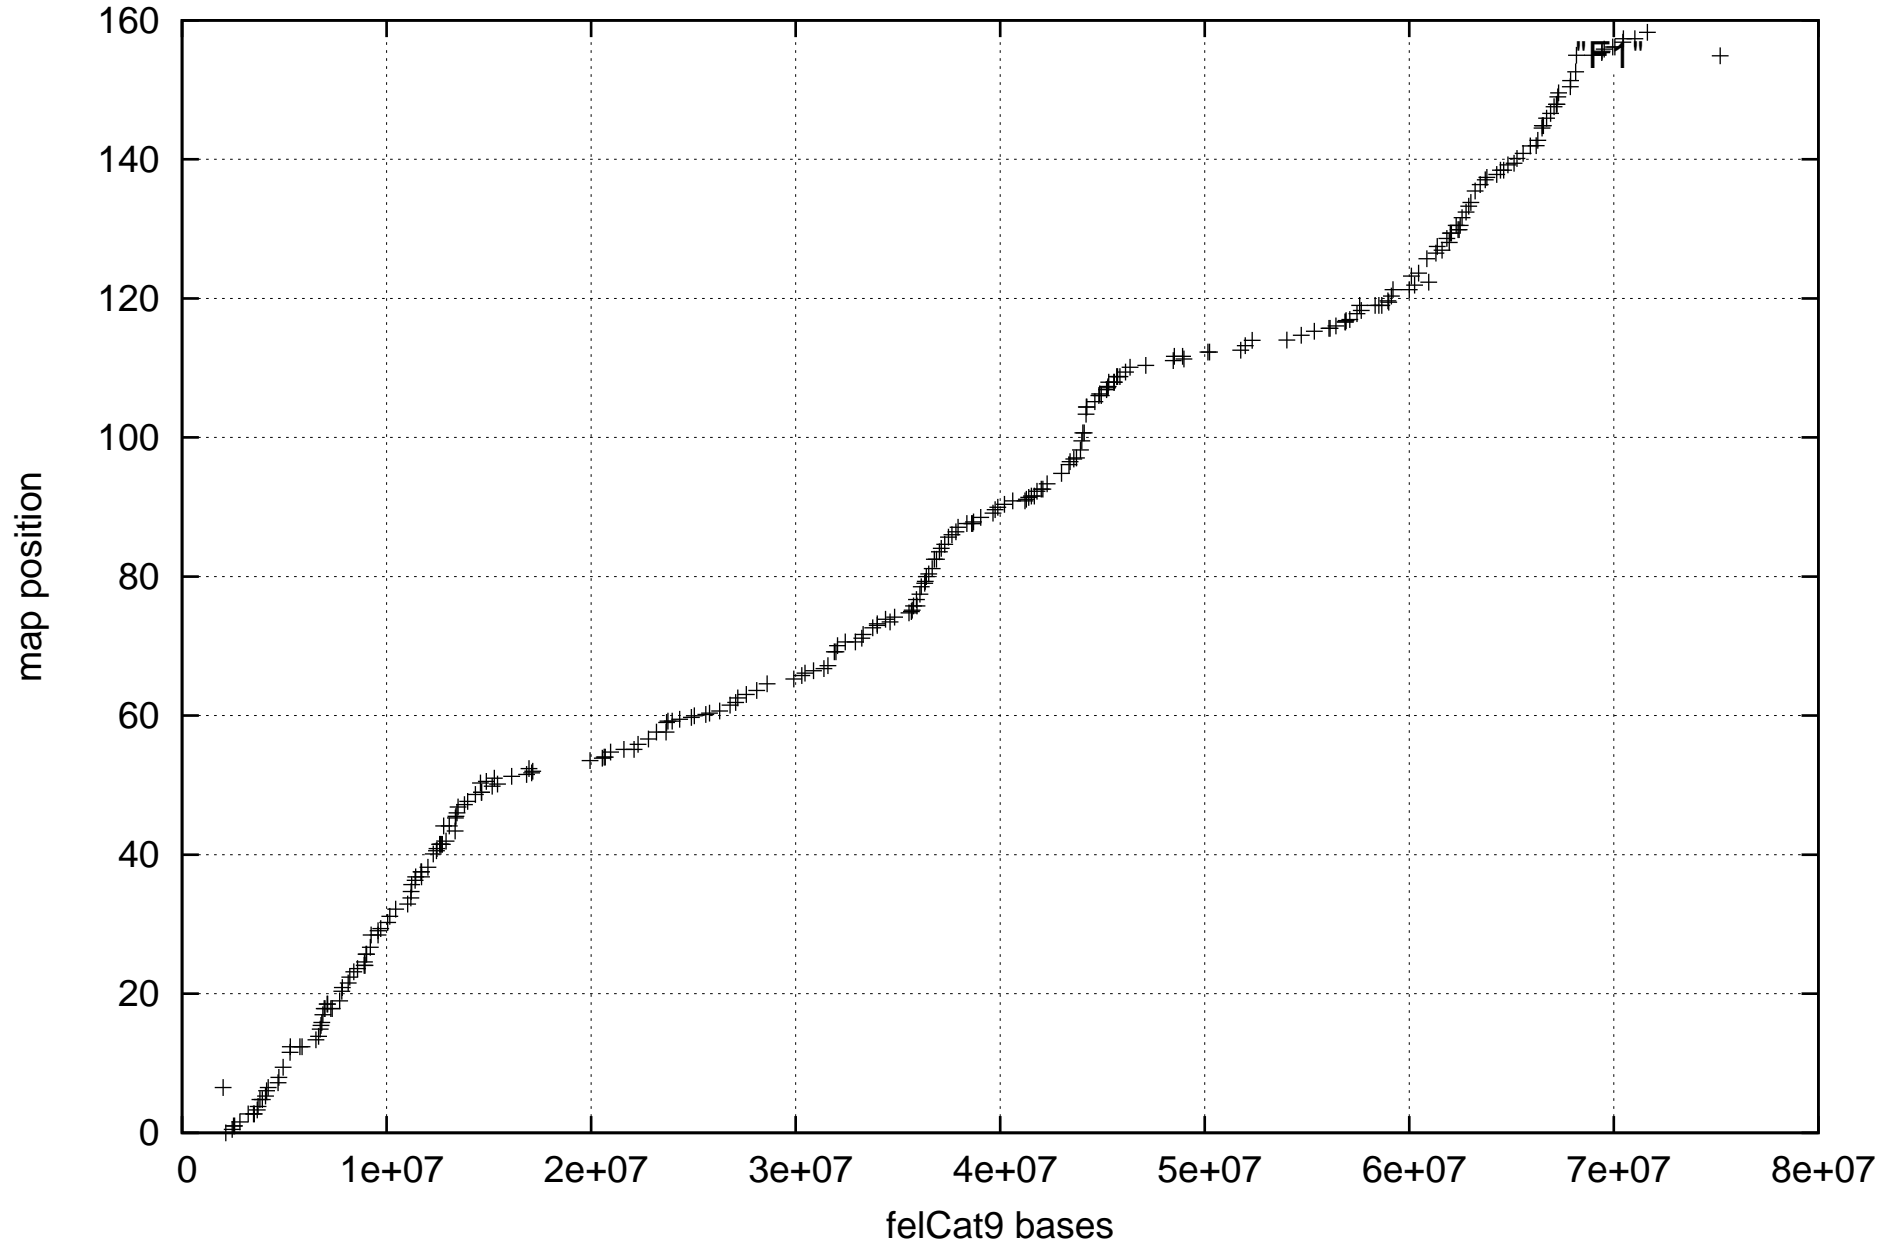

felCat9 recombination

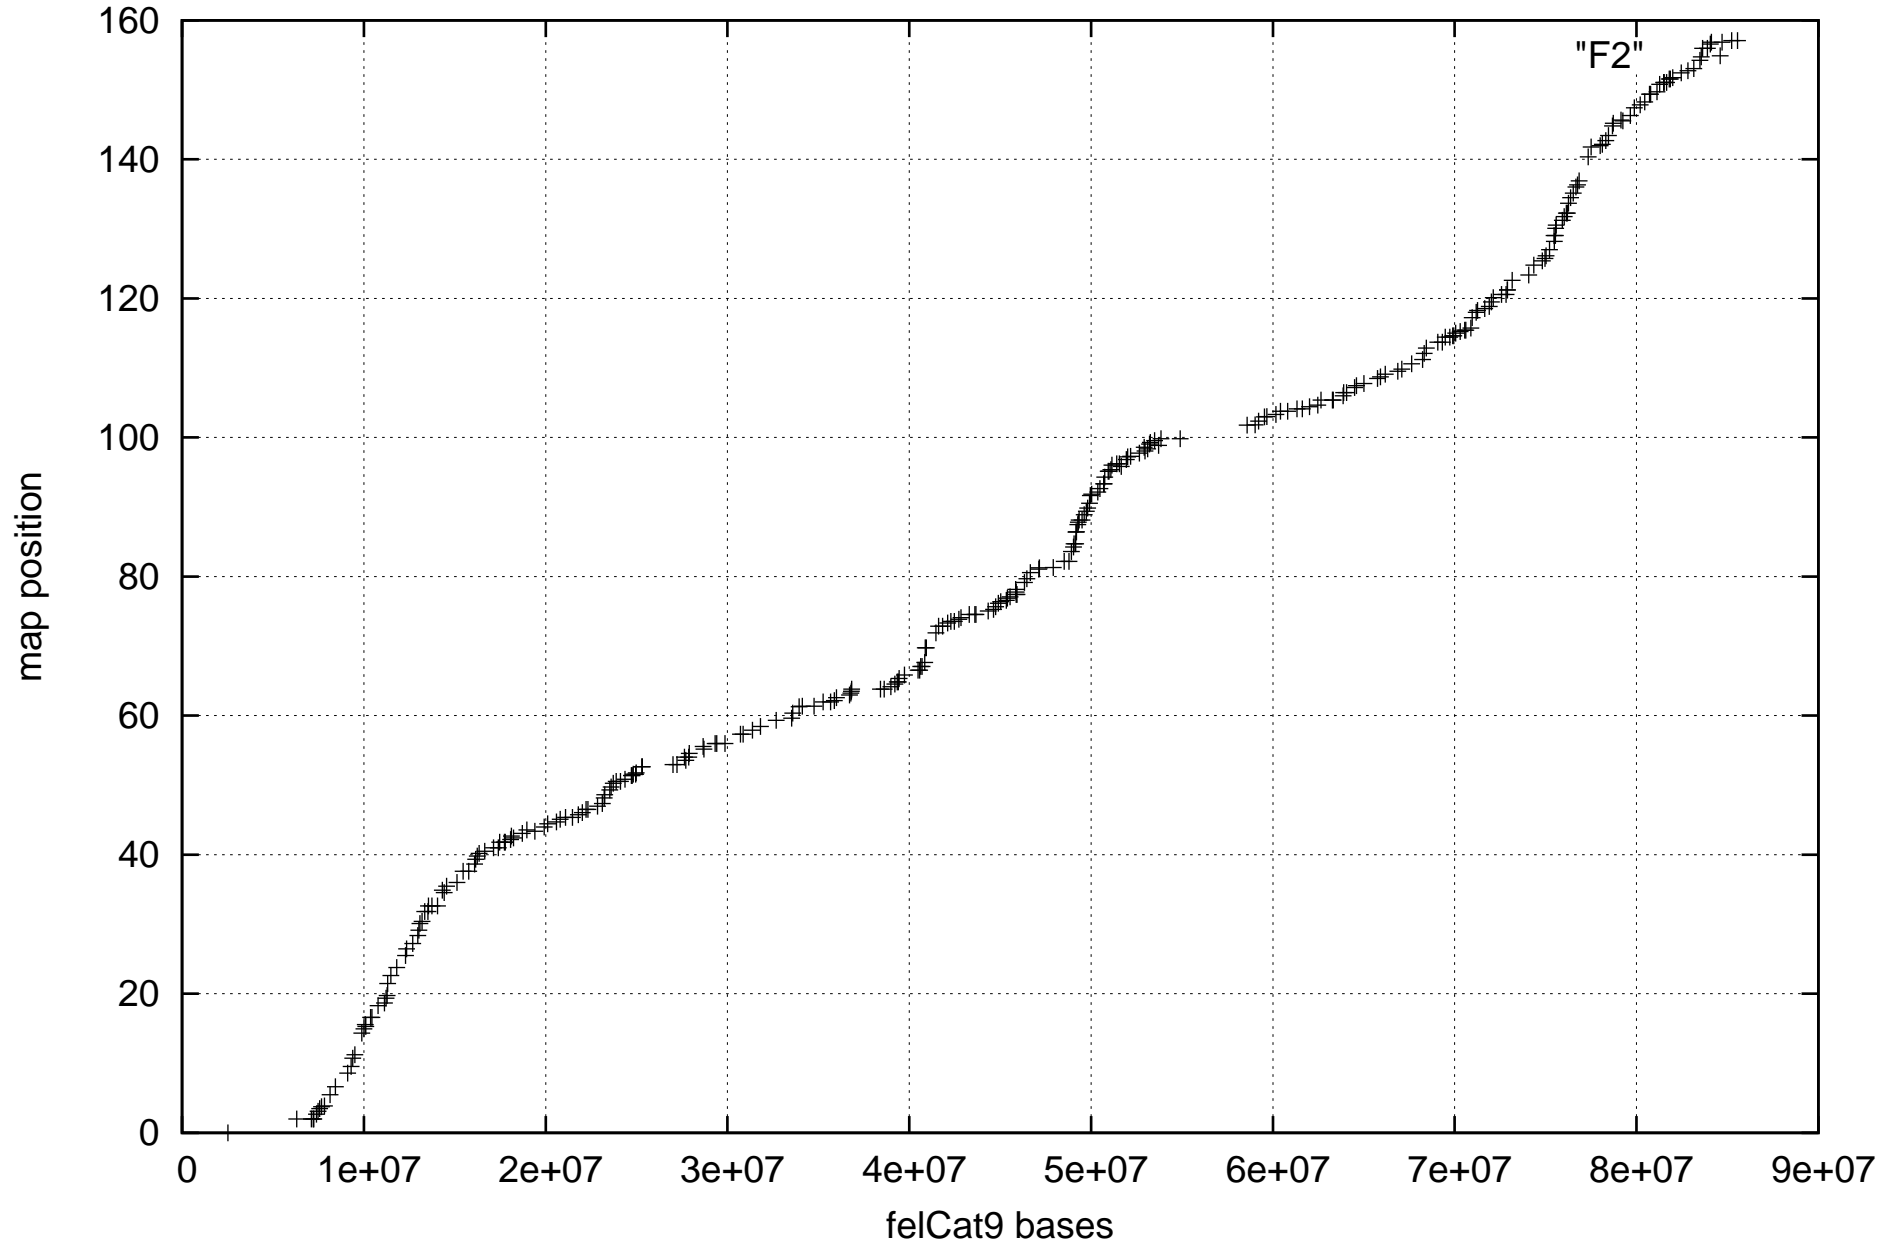

# felCat9 recombination

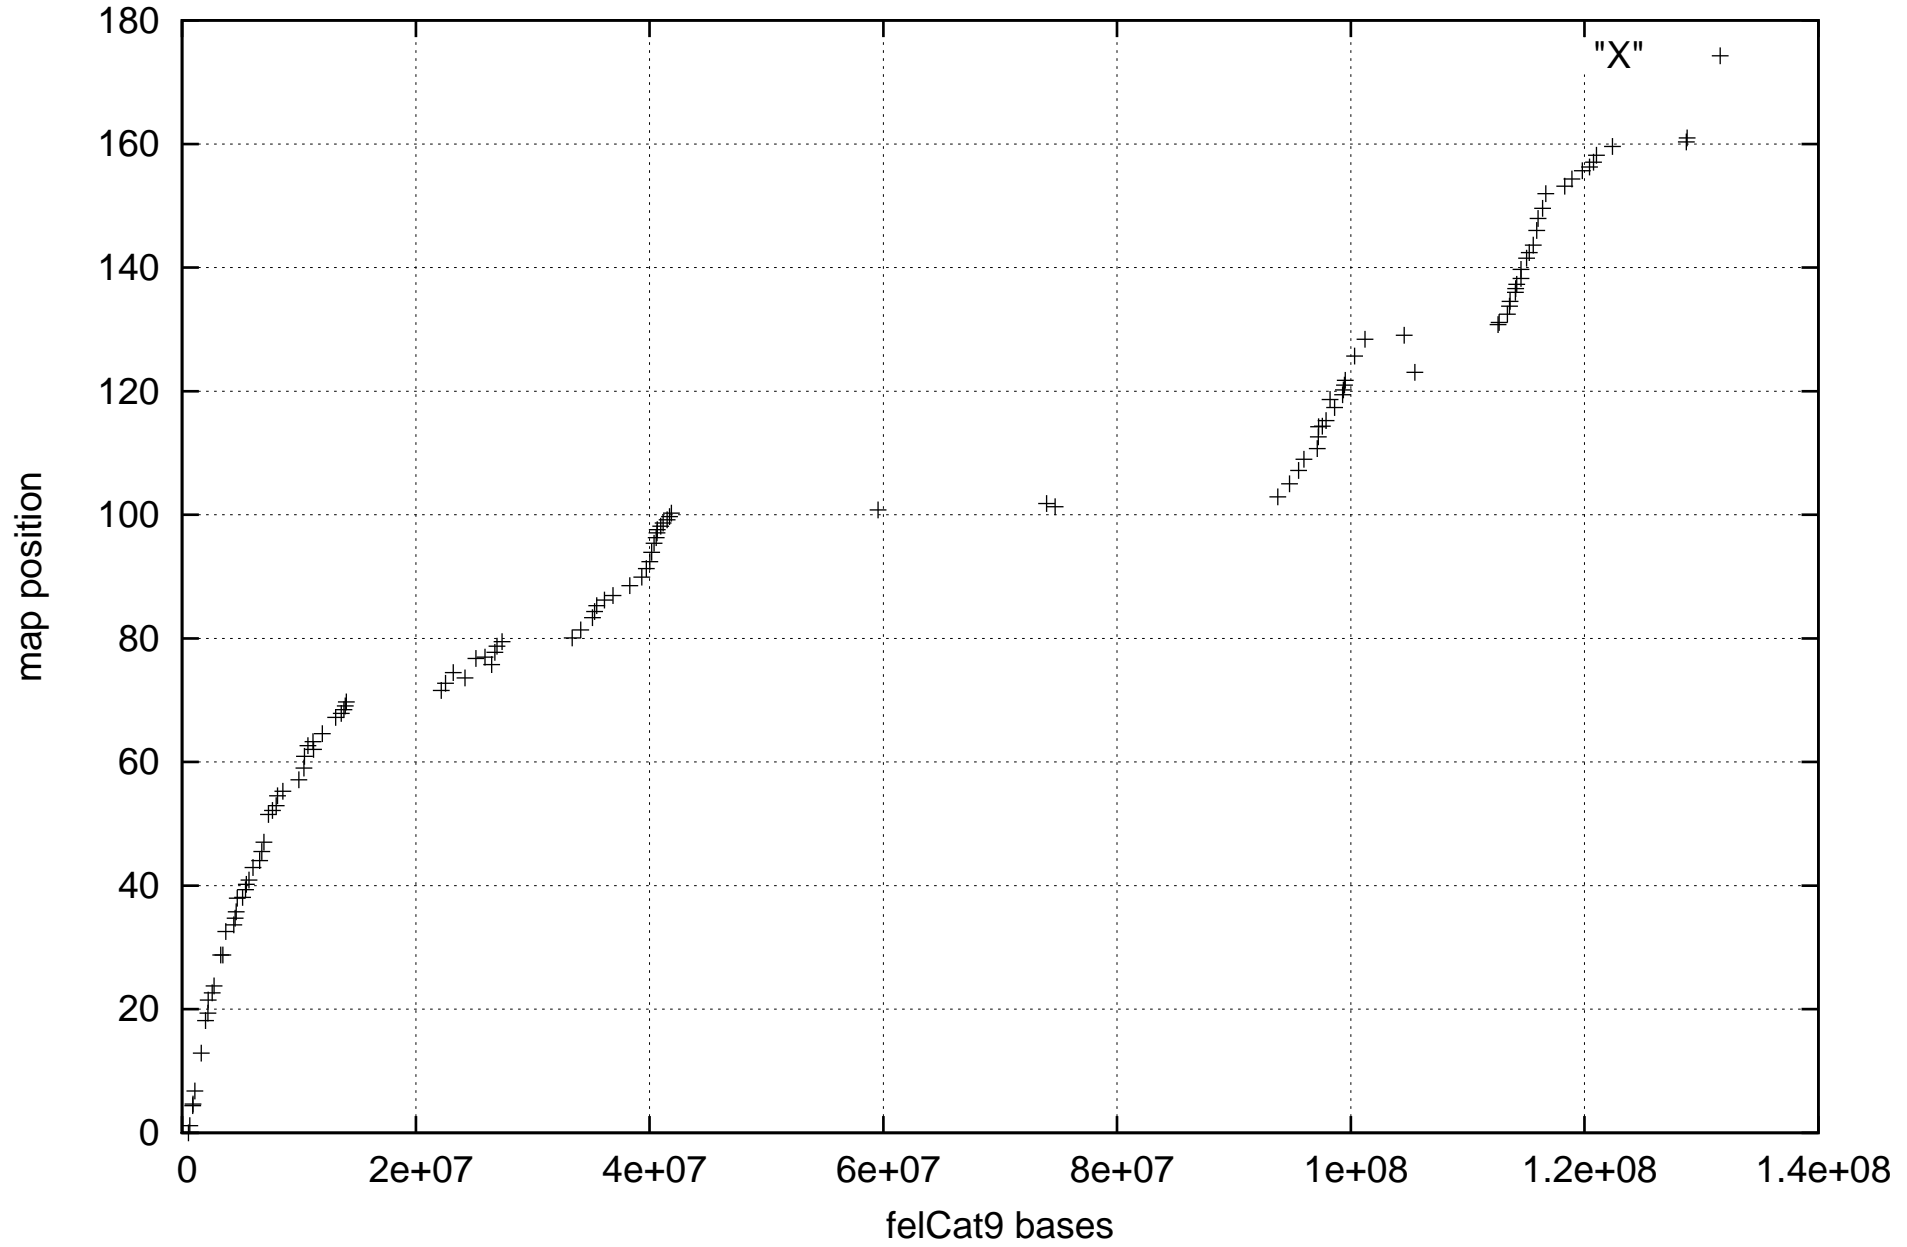

Supplement: pgen.1008926.s020.pdf [file pgen.1008926.s020.pdf]
